# Supplementary material for: Genetic dissection of grain iron concentration in hexaploid wheat (Triticum aestivum L.) using a genome-wide association analysis method
Source: PeerJ. 2022 Jul 22;10:e13625. doi: 10.7717/peerj.13625 (PMC9310890; doi:10.7717/peerj.13625)
Supplement: Supplemental Information 2 [file peerj-10-13625-s002.xlsx]

## Sheet: Table S1
Table S1 The mean value of grain Fe concentrations for GWAS population in Kaifeng, Shangqiu and Yuanyang environments
	E1c (Yuanyang)		E2d (Shangqiu)		E3f (Kaifeng)
Noa	PCb	Grain Fe concentrations (mg/kg)	PCb	Grain Fe concentrations (mg/kg)	PCb	Grain Fe concentrations (mg/kg)
1	AH240	29.59	SH240	83.59	KH240	161.9
2	AH241	73.1	SH241	87.32	KH241	126.61
3	AH242	61.18	SH242	103.41	KH242	237.74
4	AH243	77.56	SH243	70.37	KH243	103.24
5	AH244	74.68	SH244	85.02	KH244	117.07
6	AH245	87.9	SH245	89.62	KH245	80.82
7	AH246	68.36	SH246	97.95	KH246	215.8
8	AH247	58.6	SH247	84.74	KH247	72.23
9	AH248	89.62	SH248	89.05	KH248	175.74
10	AH249	28.15	SH249	92.49	KH249	103.24
11	AH250	64.34	SH250	82.29	KH250	127.09
12	AH251	31.31	SH251	83.3	KH251	23.01
13	AH252	64.34	SH252	60.61	KH252	37.89
14	AH253	78.13	SH253	70.81	KH253	57.92
15	AH254	36.19	SH254	88.76	KH254	31.21
16	AH255	61.04	SH255	81	KH255	25.49
17	AH256	36.91	SH256	96.23	KH256	28.35
18	AH257	56.01	SH257	158.27	KH257	19.29
19	AH258	62.91	SH258	93.35	KH258	35.03
20	AH259	56.73	SH259	120.5	KH259	11.18
21	AH260	64.92	SH260	90.48	KH260	25.97
22	AH261	65.63	SH261	109.44	KH261	14.04
23	AH262	74.14	SH262	70.95	KH262	24.54
24	AH263	53.28	SH263	92.49	KH263	16.41
25	AH264	52.57	SH264	70.95	KH264	35.03
26	AH265	45.82	SH265	115.47	KH265	26.92
27	AH266	93.35	SH266	103.69	KH266	33.12
28	AH267	59.75	SH267	72.1	KH267	23.58
29	AH268	83.59	SH268	117.48	KH268	17.86
30	AH269	64.92	SH269	78.13	KH269	19.29
31	AH270	74.4	SH270	82.01	KH270	21.64
32	AH271	65.2	SH271	77.7	KH271	26.24
33	AH272	77.27	SH272	133.85	KH272	23.64
34	AH273	43.09	SH273	85.31	KH273	28.83
35	AH274	87.03	SH274	71.52	KH274	21.66
36	AH275	70.39	SH275	83.34	KH275	35.51
37	AH276	52.85	SH276	88.1	KH276	23.1
38	AH277	67.07	SH277	88.46	KH277	17.38
39	AH278	58.45	SH278	88.39	KH278	21.2
40	AH279	47.97	SH279	90.6	KH279	15.99
41	AH280	93.22	SH280	82.19	KH280	14.04
42	AH281	82.1	SH281	84.83	KH281	18.81
43	AH282	80.72	SH282	85.86	KH282	15.95
44	AH283	112.02	SH283	71.28	KH283	38.37
45	AH284	64.34	SH284	79.39	KH284	54.58
46	AH285	43.52	SH285	84.43	KH285	33.6
47	AH286	66.93	SH286	84.91	KH286	30.74
48	AH287	107.72	SH287	73.9	KH287	30.26
49	AH288	63.48	SH288	78.97	KH288	29.75
50	AH289	51.25	SH289	86.02	KH289	56.49
51	AH290	56.87	SH290	83.34	KH290	38.84
52	AH291	57.02	SH291	90.14	KH291	15.95
53	AH292	49.12	SH292	87.68	KH292	24.54
54	AH293	61.76	SH293	91.23	KH293	10.7
55	AH294	64.05	SH294	82.52	KH294	41.23
56	AH295	56.44	SH295	88.83	KH295	20.24
57	AH296	67.65	SH296	85.81	KH296	26.92
58	AH297	52.85	SH297	92.34	KH297	10.32
59	AH298	64.77	SH298	85.14	KH298	30.74
60	AH299	67.79	SH299	83.06	KH299	37.89
61	AH300	56.16	SH300	79.06	KH300	55.06
62	AH301	44.52	SH301	76.18	KH301	60.79
63	AH302	54.43	SH302	74.82	KH302	72.23
64	AH303	57.88	SH303	75.14	KH303	72.71
65	AH304	48.54	SH304	82.66	KH304	40.28
66	AH305	56.59	SH305	80.52	KH305	49.38
67	AH306	53.14	SH306	75.41	KH306	68.89
68	AH307	52.57	SH307	81.92	KH307	43.61
69	AH308	83.59	SH308	79.37	KH308	45.05
70	AH309	62.33	SH309	76.02	KH309	70.33
71	AH310	62.62	SH310	79.5	KH310	54.11
72	AH311	56.16	SH311	87.75	KH311	73.19
73	AH312	56.87	SH312	82.01	KH312	100.37
74	AH313	58.88	SH313	112.02	KH313	86.54
75	AH314	64.77	SH314	78.99	KH314	54.11
76	AH315	87.61	SH315	82.44	KH315	125.18
77	AH316	70.09	SH316	91.34	KH316	64.12
78	AH317	55.01	SH317	82.29	KH317	67.46
79	AH318	64.63	SH318	80.72	KH318	75.57
80	AH319	96.23	SH319	93.35	KH319	77.48
81	AH320	72.67	SH320	69.94	KH320	132.33
82	AH321	57.45	SH321	65.2	KH321	100.85
83	AH322	47.11	SH322	76.98	KH322	106.1
84	AH323	52.28	SH323	62.62	KH323	101.33
85	AH324	65.78	SH324	67.21	KH324	4.67
86	AH325	38.35	SH325	58.31	KH325	104.67
87	AH326	37.34	SH326	57.3	KH326	54.11
88	AH327	40.79	SH327	65.78	KH327	62.22
89	AH328	77.41	SH328	73.53	KH328	180.51
90	AH329	42.51	SH329	60.03	KH329	85.11
91	AH330	64.49	SH330	69.23	KH330	48.38
92	AH331	64.63	SH331	65.06	KH331	60.31
93	AH332	36.77	SH332	57.74	KH332	61.26
94	AH333	47.68	SH333	66.07	KH333	116.59
95	AH334	82.01	SH334	78.13	KH334	76.05
96	AH335	70.66	SH335	73.1	KH335	108.01
97	AH336	45.24	SH336	71.38	KH336	118.02
98	AH337	43.66	SH337	62.33	KH337	135.67
99	AH338	72.1	SH338	55.29	KH338	63.65
100	AH339	60.03	SH339	63.34	KH339	75.57
101	AH340	55.01	SH340	70.95	KH340	79.39
102	AH341	40.64	SH341	47.97	KH341	100.85
103	AH342	56.16	SH342	62.04	KH342	116.59
104	AH343	64.34	SH343	68.08	KH343	103.71
105	AH344	69.51	SH344	80.72	KH344	111.35
106	AH345	49.12	SH345	62.62	KH345	115.64
107	AH346	43.37	SH346	90.77	KH346	160.95
108	AH347	44.81	SH347	62.14	KH347	175.74
109	AH348	47.11	SH348	79.86	KH348	225.82
110	AH349	46.25	SH349	20.24	KH349	211.02
111	AH350	66.64	SH350	66.99	KH350	221.53
112	AH351	41.65	SH351	52.16	KH351	216.76
113	AH352	53.43	SH352	43.14	KH352	200.54
114	AH353	44.52	SH353	40.12	KH353	225.84
115	AH354	50.55	SH354	34.55	KH354	205.31
116	AH355	53.14	SH355	32.11	KH355	230.59
117	AH356	49.46	SH356	39.2	KH356	196.25
118	AH357	45.38	SH357	57.92	KH357	226.77
119	AH358	45.53	SH358	52.08	KH358	218.19
120	AH359	47.11	SH359	42.17	KH359	230.59
121	AH360	41.08	SH360	40.75	KH360	231.54
122	AH361	33.03	SH361	44.57	KH361	218.67
123	AH362	45.96	SH362	50.77	KH362	75.57
124	AH363	50.99	SH363	53.63	KH363	71.28
125	AH364	53	SH364	58.88	KH364	76.53
126	AH365	46.53	SH365	52.17	KH365	58.88
127	AH366	55.87	SH366	46.95	KH366	51.25
128	AH367	44.24	SH367	105.62	KH367	67.46
129	AH368	42.66	SH368	58.72	KH368	79.39
130	AH369	40.5	SH369	52.68	KH369	54.11
131	AH370	45.1	SH370	62.22	KH370	131.38
132	AH371	48.86	SH371	41.23	KH371	75.09
133	AH372	69.9	SH372	72.28	KH372	92.74
134	AH373	117.07	SH373	134.24	KH373	72.23
135	AH374	92.06	SH374	97.51	KH374	83.68
136	AH375	108.96	SH375	94.17	KH375	75.57
137	AH376	72.85	SH376	71.28	KH376	64.6
138	AH377	86.54	SH377	67.46	KH377	103.24
139	AH378	66.03	SH378	64.6	KH378	1.33
140	AH379	72.02	SH379	77.48	KH379	155.7
141	AH380	86.54	SH380	45.52	KH380	80.82
142	AH381	69.03	SH381	47.91	KH381	111.82
143	AH382	72.71	SH382	66.03	KH382	169.37
144	AH383	68.53	SH383	59.83	KH383	158.57
145	AH384	64.07	SH384	59.35	KH384	101.81
146	AH385	63.52	SH385	50.77	KH385	149.03
147	AH386	76.05	SH386	65.56	KH386	64.6
148	AH387	77.96	SH387	50.77	KH387	99.9
149	AH388	50.77	SH388	79.86	KH388	77.48
150	AH389	93.22	SH389	65.08	KH389	72.71
151	AH390	53.63	SH390	70.33	KH390	85.59
152	AH391	103.24	SH391	53.63	KH391	64.6
153	AH392	72.23	SH392	88.93	KH392	95.13
154	AH393	83.2	SH393	97.99	KH393	107.53
155	AH394	85.11	SH394	75.09	KH394	97.04
156	AH395	62.01	SH395	96.56	KH395	112.78
157	AH396	45.52	SH396	78.43	KH396	75.57
158	AH397	58.88	SH397	46.48	KH397	104.19
159	AH398	54.11	SH398	69.37	KH398	110.39
160	AH399	88.93	SH399	124.22	KH399	107.05
161	AH400	54.11	SH400	71.28	KH400	105.14
162	AH401	65.08	SH401	110.87	KH401	145.69
163	AH402	83.68	SH402	69.85	KH402	94.17
164	AH403	77	SH403	121.84	KH403	131.86
165	AH404	76.53	SH404	108.48	KH404	143.3
166	AH405	78.43	SH405	46.95	KH405	150.93
167	AH406	77.48	SH406	46.95	KH406	193.86
168	AH407	124.22	SH407	69.85	KH407	128.52
169	AH408	91.31	SH408	38.84	KH408	129.95
170	AH409	118.02	SH409	59.35	KH409	89.4
171	AH410	119.93	SH410	48.86	KH410	88.93
172	AH411	98.47	SH411	41.71	KH411	116.59
173	AH412	98.94	SH412	41.71	KH412	95.6
174	AH413	131.38	SH413	56.02	KH413	92.74
175	AH414	99.42	SH414	63.17	KH414	145.69
176	AH415	82.73	SH415	41.71	KH415	122.32
177	AH416	125.63	SH416	32.17	KH416	99.9
178	AH417	78.43	SH417	49.82	KH417	95.13
179	AH418	143.78	SH418	20.23	KH418	85.59
180	AH419	85.11	SH419	26.92	KH419	124.22
181	AH420	108.96	SH420	29.78	KH420	102.76
182	AH421	100.85	SH421	123.75	KH421	110.39
183	AH422	130.9	SH422	105.14	KH422	149.5
184	AH423	71.23	SH423	78.43	KH423	122.79
185	AH424	63.17	SH424	67.64	KH424	118.98
186	AH425	105.14	SH425	85.11	KH425	125.18
187	AH426	89.4	SH426	64.6	KH426	145.69
188	AH427	124.22	SH427	68.89	KH427	142.83
189	AH428	128.52	SH428	107.53	KH428	196.25
190	AH429	133.76	SH429	90.36	KH429	144.26
191	AH430	60.26	SH430	74.14	KH430	186.23
192	AH432	82.71	SH432	76.53	KH432	211.99
193	AH433	114.68	SH433	63.17	KH433	202.93
194	AH434	82.07	SH434	61.26	KH434	227.25
195	AH435	78.43	SH435	48.38	KH435	228.2
196	AH436	72.12	SH436	99.42	KH436	216.76
197	AH437	88.45	SH437	77.96	KH437	223.91
198	AH438	78.1	SH438	93.22	KH438	250.62
199	AH439	76.53	SH439	73.19	KH439	216.28
200	AH440	76.53	SH440	53.63	KH440	128.52
201	AH441	62.17	SH441	46.48	KH441	141.39
202	AH442	53.63	SH442	77.96	KH442	162.38
203	AH443	49.21	SH443	105.14	KH443	178.6
204	AH444	72.71	SH444	65.56	KH444	200.06
205	AH445	46.48	SH445	62.69	KH445	245.85
206	AH446	72.23	SH446	60.31	KH446	179.55
207	AH447	69.08	SH447	65.56	KH447	217.93
a No is the series number of wheat germplasms.
b PC refer to planting code for wheat gernplasms.
c E1 refer to Yuanyang environment.
d E2 refer to Shangqiu environment.
f E3 refer to Kaifeng environment.
