# Supplementary material for: Genetic dissection of grain iron concentration in hexaploid wheat (Triticum aestivum L.) using a genome-wide association analysis method
Source: PeerJ. 2022 Jul 22;10:e13625. doi: 10.7717/peerj.13625 (PMC9310890; doi:10.7717/peerj.13625)
Supplement: Supplemental Information 3 [file peerj-10-13625-s003.xlsx]

## Sheet: Table S2
Table S2 List of significant SNP and their detailed information for Fe concentration identified by GWAS
Ea	SNP	Chromosome	Position	P.value	Rsquare.of.Model.with.SNP	FDR_Adjusted_P.values
KF	AX-108772562	1A	3260219	0.000873181	0.10416	0.921169
KF	AX-110406358	1A	3369558	0.000605647	0.107551	0.832013
KF	AX-109920274	1A	3912423	0.000757756	0.105471	0.879964
KF	AX-110443058	1A	6734072	0.000258429	0.115534	0.736152
KF	AX-108776615	1A	6901249	0.000285348	0.114599	0.736152
KF	AX-111593268	1A	6908214	0.000596029	0.1077	0.832013
KF	AX-94771589	1A	7181674	0.000721065	0.105931	0.850412
KF	AX-109322832	1A	7182359	0.000287107	0.114541	0.736152
KF	AX-109379455	1A	12172832	0.000797083	0.105003	0.886507
KF	AX-94429735	1A	12181920	0.000779442	0.10521	0.879964
KF	AX-110969984	1A	12191573	0.000368583	0.112191	0.787491
KF	AX-109939970	1A	12192544	0.000368583	0.112191	0.787491
YY	AX-111597077	1A	45777919	0.000927374	0.1163	0.897351
YY	AX-94443959	1A	136953325	0.000521815	0.121558	0.897351
YY	AX-109356451	1A	301204340	0.0009914	0.115693	0.897351
YY	AX-110364488	1A	308951536	0.0009914	0.115693	0.897351
YY	AX-109475709	1A	308954484	0.0009914	0.115693	0.897351
YY	AX-111032044	1A	308955293	0.0009914	0.115693	0.897351
YY	AX-109333623	1A	308997151	0.0009914	0.115693	0.897351
YY	AX-110006972	1A	309033070	0.0009914	0.115693	0.897351
YY	AX-109414694	1A	309059698	0.0009914	0.115693	0.897351
YY	AX-111523338	1A	309401176	0.0009914	0.115693	0.897351
YY	AX-109542328	1A	309404136	0.0009914	0.115693	0.897351
YY	AX-108920715	1A	309539080	0.000574273	0.120678	0.897351
YY	AX-109078403	1A	309572676	0.00084796	0.117115	0.897351
KF	AX-111720351	1A	309706191	0.000410714	0.111176	0.797068
KF	AX-110488359	1A	309706394	0.000410714	0.111176	0.797068
YY	AX-111736804	1A	309707003	0.000926462	0.116309	0.897351
KF	AX-109935460	1A	309708564	0.000418565	0.110999	0.797068
YY	AX-110988977	1A	309708686	0.000926462	0.116309	0.897351
KF	AX-109865387	1A	309709493	0.000410714	0.111176	0.797068
YY	AX-111707554	1A	309739567	0.0009914	0.115693	0.897351
YY	AX-109869754	1A	309755311	0.0009914	0.115693	0.897351
YY	AX-110082678	1A	310254339	0.00089916	0.116581	0.897351
YY	AX-110493826	1A	311230508	0.000970794	0.115884	0.897351
YY	AX-109928420	1A	312011400	0.000868677	0.116895	0.897351
YY	AX-110906287	1A	312313377	0.0009914	0.115693	0.897351
YY	AX-111166126	1A	312773508	0.0009914	0.115693	0.897351
YY	AX-109312737	1A	313268228	0.0009914	0.115693	0.897351
YY	AX-110606292	1A	313729738	0.0009914	0.115693	0.897351
YY	AX-111611246	1A	314625584	0.0009914	0.115693	0.897351
YY	AX-109940011	1A	315261389	0.0009914	0.115693	0.897351
YY	AX-109374281	1A	316955744	0.000921438	0.116358	0.897351
YY	AX-110533880	1A	317409355	0.0009914	0.115693	0.897351
YY	AX-111543220	1A	320328948	0.000897956	0.116593	0.897351
YY	AX-109373293	1A	320331200	0.000826574	0.117347	0.897351
SQ	AX-111058226	1A	338830974	0.000716586	0.0610915	0.361905
YY	AX-94719007	1A	355324430	0.000765202	0.118051	0.897351
SQ	AX-95178074	1A	377027087	0.000209	0.0732258	0.359811
SQ	AX-110371299	1A	395181283	0.000960491	0.0582476	0.366438
YY	AX-110915738	1A	442802359	0.000633379	0.11978	0.897351
YY	AX-110616339	1A	445268632	0.000582439	0.120549	0.897351
SQ	AX-109009522	1A	497073709	0.000726755	0.0609543	0.361905
SQ	AX-110462125	1A	497074141	0.000876637	0.0591326	0.361905
SQ	AX-108927297	1A	497077151	0.000876637	0.0591326	0.361905
SQ	AX-111739616	1A	497082590	0.000876637	0.0591326	0.361905
SQ	AX-111709931	1A	497082636	0.000876637	0.0591326	0.361905
SQ	AX-111081912	1A	497109008	0.000876637	0.0591326	0.361905
SQ	AX-111555234	1A	497170208	0.000876637	0.0591326	0.361905
SQ	AX-109436247	1A	497183802	0.000876637	0.0591326	0.361905
SQ	AX-89665176	1A	497191459	0.000876637	0.0591326	0.361905
SQ	AX-109528407	1A	497194286	0.000876637	0.0591326	0.361905
SQ	AX-110447226	1A	497207965	0.000876637	0.0591326	0.361905
YY	AX-110912741	1A	504855880	0.000501989	0.121914	0.897351
KF	AX-109487734	1A	560890453	0.000229739	0.116647	0.736152
SQ	AX-110938695	1A	574937064	0.000881214	0.0590821	0.361905
KF	AX-111071366	1B	328824347	0.000697304	0.106242	0.846964
KF	AX-109921439	1B	328878430	0.000697304	0.106242	0.846964
KF	AX-111580083	1B	328879038	0.000697304	0.106242	0.846964
KF	AX-109967610	1B	328879132	0.000697304	0.106242	0.846964
KF	AX-110360834	1B	328880060	0.000697304	0.106242	0.846964
SQ	AX-108987264	1B	336787649	0.000909973	0.0587708	0.361905
SQ	AX-111472228	1B	338612509	0.000970006	0.0581522	0.368161
YY	AX-94632727	1B	385161579	0.000866012	0.116923	0.897351
SQ	AX-110448925	1B	390378403	0.000154359	0.0762505	0.359811
SQ	AX-111583289	1B	392738625	0.000154359	0.0762505	0.359811
SQ	AX-108910861	1B	393081047	0.00016375	0.0756599	0.359811
SQ	AX-108943834	1B	393092360	8.75447e-05	0.0819512	0.359811
SQ	AX-111038986	1B	393281971	0.000154359	0.0762505	0.359811
SQ	AX-108751995	1B	393295761	0.000154359	0.0762505	0.359811
SQ	AX-111069537	1B	393297538	8.81085e-05	0.0818864	0.359811
SQ	AX-108976143	1B	393328833	0.000154359	0.0762505	0.359811
SQ	AX-109445191	1B	393437783	8.81085e-05	0.0818864	0.359811
SQ	AX-110919607	1B	393444663	0.000154359	0.0762505	0.359811
SQ	AX-111625151	1B	393449087	0.000181122	0.0746529	0.359811
SQ	AX-110497388	1B	393508153	0.000321444	0.0689558	0.359811
SQ	AX-109308643	1B	393508230	0.000154359	0.0762505	0.359811
SQ	AX-111717169	1B	393512736	0.000924796	0.0586143	0.361905
SQ	AX-110933615	1B	393540566	0.000562372	0.0634564	0.361905
SQ	AX-94535280	1B	393543018	0.000587828	0.0630235	0.361905
SQ	AX-111570903	1B	393544465	0.000924796	0.0586143	0.361905
SQ	AX-109951295	1B	393577327	0.000924796	0.0586143	0.361905
SQ	AX-110046396	1B	393578376	0.000924796	0.0586143	0.361905
SQ	AX-109971817	1B	393600174	0.000924796	0.0586143	0.361905
SQ	AX-109978118	1B	393601156	0.000924796	0.0586143	0.361905
SQ	AX-108739144	1B	393602304	0.000924796	0.0586143	0.361905
SQ	AX-111676956	1B	393612689	0.000924796	0.0586143	0.361905
SQ	AX-111489727	1B	393613792	0.000522707	0.0641723	0.361905
SQ	AX-111212945	1B	393626375	0.000924796	0.0586143	0.361905
SQ	AX-111562143	1B	393626926	0.000924796	0.0586143	0.361905
SQ	AX-109473264	1B	393642203	0.000499628	0.0646148	0.361905
SQ	AX-109841733	1B	393649390	0.00086373	0.0592765	0.361905
SQ	AX-111216541	1B	393686173	0.000562372	0.0634564	0.361905
SQ	AX-111520430	1B	393686633	0.000521639	0.0641923	0.361905
SQ	AX-109924855	1B	393687756	0.000924796	0.0586143	0.361905
SQ	AX-110033689	1B	393707389	0.00063593	0.0622554	0.361905
SQ	AX-108857517	1B	393708440	0.000924796	0.0586143	0.361905
SQ	AX-111567512	1B	393708751	0.000924796	0.0586143	0.361905
SQ	AX-109989082	1B	393712553	0.000924796	0.0586143	0.361905
SQ	AX-109928788	1B	393714345	0.000924796	0.0586143	0.361905
SQ	AX-108850781	1B	393715656	0.000924796	0.0586143	0.361905
SQ	AX-111692415	1B	393720056	0.000924796	0.0586143	0.361905
SQ	AX-108806604	1B	393761156	0.000924796	0.0586143	0.361905
SQ	AX-109872495	1B	393761402	0.000767524	0.0604233	0.361905
SQ	AX-109921635	1B	393762188	0.000924796	0.0586143	0.361905
SQ	AX-108861361	1B	393763022	0.000924796	0.0586143	0.361905
SQ	AX-110024721	1B	393764519	0.000924796	0.0586143	0.361905
SQ	AX-111154386	1B	393788486	0.000924796	0.0586143	0.361905
SQ	AX-111011572	1B	393800858	0.000924796	0.0586143	0.361905
SQ	AX-108839019	1B	393802919	0.000924796	0.0586143	0.361905
SQ	AX-109318257	1B	393859500	0.000904761	0.0588265	0.361905
SQ	AX-111473824	1B	393862830	0.000924796	0.0586143	0.361905
SQ	AX-108858687	1B	393863116	0.000924796	0.0586143	0.361905
SQ	AX-111136077	1B	393863476	0.000924796	0.0586143	0.361905
SQ	AX-109486853	1B	393864016	0.000930909	0.0585505	0.361905
SQ	AX-109442100	1B	393864763	0.000562372	0.0634564	0.361905
SQ	AX-111528052	1B	393997119	0.000562372	0.0634564	0.361905
SQ	AX-110580128	1B	393998475	0.000924796	0.0586143	0.361905
SQ	AX-111153034	1B	393998509	0.000924796	0.0586143	0.361905
SQ	AX-108895422	1B	394004172	0.000924796	0.0586143	0.361905
SQ	AX-108898752	1B	394004304	0.000562372	0.0634564	0.361905
SQ	AX-110420343	1B	394030927	0.000924796	0.0586143	0.361905
SQ	AX-111559502	1B	394064977	0.000924796	0.0586143	0.361905
SQ	AX-110122314	1B	394066129	0.000924796	0.0586143	0.361905
SQ	AX-110051262	1B	394073265	0.000924796	0.0586143	0.361905
SQ	AX-111106191	1B	394074545	0.000924796	0.0586143	0.361905
SQ	AX-110961111	1B	394074685	0.000924796	0.0586143	0.361905
SQ	AX-111483071	1B	394078343	0.000324039	0.0688764	0.359811
SQ	AX-110438367	1B	394084504	0.000324039	0.0688764	0.359811
SQ	AX-109616597	1B	394326123	0.000324039	0.0688764	0.359811
SQ	AX-109503726	1B	394326654	0.000438498	0.0658957	0.36032
SQ	AX-109966593	1B	394392782	0.000324039	0.0688764	0.359811
SQ	AX-111231820	1B	394392824	0.000324039	0.0688764	0.359811
SQ	AX-111091535	1B	394401153	0.000324039	0.0688764	0.359811
SQ	AX-108827477	1B	394408986	0.000324039	0.0688764	0.359811
SQ	AX-110027003	1B	394410207	0.000324039	0.0688764	0.359811
SQ	AX-109524831	1B	394412090	0.000105773	0.0800442	0.359811
SQ	AX-89372080	1B	394412224	0.000100516	0.0805577	0.359811
SQ	AX-109023127	1B	394412654	0.000105773	0.0800442	0.359811
SQ	AX-110121742	1B	394413242	0.000105773	0.0800442	0.359811
SQ	AX-109349932	1B	394445100	0.000105773	0.0800442	0.359811
SQ	AX-111026284	1B	394451111	0.000105773	0.0800442	0.359811
SQ	AX-109509649	1B	394453219	0.000175256	0.0749815	0.359811
SQ	AX-110036382	1B	394454380	0.000105773	0.0800442	0.359811
SQ	AX-110048952	1B	394505232	0.000105773	0.0800442	0.359811
SQ	AX-110524121	1B	394505310	0.000105773	0.0800442	0.359811
SQ	AX-110641915	1B	394505547	0.000105773	0.0800442	0.359811
SQ	AX-109909338	1B	394505780	0.000105773	0.0800442	0.359811
SQ	AX-110092813	1B	394505987	0.000105773	0.0800442	0.359811
SQ	AX-109048301	1B	394512214	0.000105773	0.0800442	0.359811
SQ	AX-109399243	1B	394540727	0.000105773	0.0800442	0.359811
SQ	AX-110924737	1B	394540774	0.000105773	0.0800442	0.359811
SQ	AX-109827709	1B	394542166	0.000105773	0.0800442	0.359811
SQ	AX-111280835	1B	394542755	0.000105773	0.0800442	0.359811
SQ	AX-108870770	1B	394632700	0.000105773	0.0800442	0.359811
SQ	AX-110494063	1B	394633017	0.000105773	0.0800442	0.359811
SQ	AX-109400290	1B	394633760	0.000105773	0.0800442	0.359811
SQ	AX-109025331	1B	394636593	8.43962e-05	0.0823211	0.359811
SQ	AX-109317395	1B	394637029	0.000105773	0.0800442	0.359811
SQ	AX-109002043	1B	394637440	0.000105773	0.0800442	0.359811
SQ	AX-110517713	1B	394639658	0.000105773	0.0800442	0.359811
SQ	AX-109843642	1B	394675284	0.000105773	0.0800442	0.359811
SQ	AX-110908392	1B	394855636	0.000216381	0.0728804	0.359811
SQ	AX-111082310	1B	394856909	0.000324026	0.0688768	0.359811
SQ	AX-111053792	1B	394857134	0.000324026	0.0688768	0.359811
SQ	AX-109334489	1B	394857311	0.000961468	0.0582377	0.366438
SQ	AX-111562634	1B	394857342	0.000324026	0.0688768	0.359811
SQ	AX-109909332	1B	394892491	0.000119277	0.0788358	0.359811
SQ	AX-110510823	1B	394892631	0.000324026	0.0688768	0.359811
SQ	AX-111194226	1B	394893541	0.000324026	0.0688768	0.359811
SQ	AX-111052608	1B	394896411	0.000324026	0.0688768	0.359811
SQ	AX-110590461	1B	394907836	0.00041521	0.0664323	0.359811
SQ	AX-111574956	1B	394908339	0.000353496	0.0680174	0.359811
SQ	AX-111017811	1B	394912271	0.000324026	0.0688768	0.359811
SQ	AX-109403588	1B	394916201	0.000324026	0.0688768	0.359811
SQ	AX-110980733	1B	394919901	0.000324026	0.0688768	0.359811
SQ	AX-109898616	1B	394929422	0.000324026	0.0688768	0.359811
SQ	AX-111051441	1B	394930008	0.000324026	0.0688768	0.359811
SQ	AX-108908089	1B	394930780	0.000324026	0.0688768	0.359811
SQ	AX-111083669	1B	394976732	0.000324026	0.0688768	0.359811
SQ	AX-111476335	1B	394996020	0.000264858	0.0708725	0.359811
SQ	AX-108980623	1B	409273408	0.000209	0.0732258	0.359811
SQ	AX-110413449	1B	409277332	7.26432e-05	0.0838379	0.359811
SQ	AX-109429327	1B	409286187	6.17558e-05	0.0854841	0.359811
SQ	AX-109907750	1B	409286833	0.000235801	0.0720259	0.359811
SQ	AX-108843465	1B	409287661	7.26432e-05	0.0838379	0.359811
SQ	AX-111595848	1B	409298721	7.26432e-05	0.0838379	0.359811
SQ	AX-109841831	1B	409298773	7.26432e-05	0.0838379	0.359811
SQ	AX-110033300	1B	409299832	4.001e-05	0.0899048	0.359811
SQ	AX-110489436	1B	409299965	2.93431e-05	0.0930801	0.359811
SQ	AX-111580308	1B	409301478	7.26432e-05	0.0838379	0.359811
SQ	AX-108903980	1B	409302131	1.41931e-05	0.100573	0.359811
SQ	AX-108868790	1B	409303937	7.26432e-05	0.0838379	0.359811
SQ	AX-111289071	1B	409309494	7.26432e-05	0.0838379	0.359811
SQ	AX-108842070	1B	409309719	3.6165e-05	0.0909379	0.359811
SQ	AX-95251676	1B	421097365	0.000848761	0.0594461	0.361905
SQ	AX-109833383	1B	603146979	0.0007558	0.060573	0.361905
SQ	AX-110550616	1B	603147101	0.000817263	0.0598132	0.361905
KF	AX-110620987	1D	5421805	0.000710876	0.106063	0.850412
KF	AX-95186276	1D	5519062	0.000250119	0.115843	0.736152
KF	AX-111164209	1D	10399216	0.000497999	0.109374	0.823127
KF	AX-110529533	1D	16132987	9.9717e-06	0.147077	0.288278
KF	AX-95658847	1D	20056510	0.000477812	0.109761	0.823127
KF	AX-94812482	2A	17032001	0.00038996	0.111662	0.796603
KF	AX-94513201	2A	17040605	0.00052605	0.108863	0.826619
KF	AX-110490034	2A	39322557	0.000534761	0.10871	0.832013
KF	AX-109825208	2A	39723505	0.000304674	0.113982	0.736152
KF	AX-109848681	2A	43152234	0.000949973	0.103383	0.945673
KF	AX-110100937	2A	43152965	0.000807655	0.104881	0.886507
KF	AX-109301023	2A	43549655	0.000691097	0.106325	0.846964
KF	AX-108747282	2A	46071413	0.000707675	0.106105	0.850412
KF	AX-111710468	2A	46073591	0.000807487	0.104883	0.886507
YY	AX-94639471	2A	52130032	0.00095753	0.116009	0.897351
YY	AX-111200432	2A	79355785	0.000736125	0.118405	0.897351
SQ	AX-109574944	2A	83586426	0.000851782	0.0594116	0.361905
YY	AX-108896742	2A	105628630	0.000725518	0.118537	0.897351
YY	AX-109293976	2A	108517228	0.000725518	0.118537	0.897351
KF	AX-95247517	2A	182302531	0.000176833	0.11913	0.706961
SQ	AX-111544060	2A	774810253	0.000972322	0.0581291	0.368161
SQ	AX-110378477	2A	774856301	0.000588652	0.0630098	0.361905
SQ	AX-109492703	2A	775026905	0.000762777	0.0604836	0.361905
SQ	AX-111455865	2A	775029238	0.00050693	0.0644726	0.361905
SQ	AX-111567626	2A	775041568	0.000726254	0.060961	0.361905
KF	AX-110518706	2B	27522279	0.000718265	0.105967	0.850412
YY	AX-108855338	2B	77961365	0.000237364	0.128853	0.897351
YY	AX-95258478	2B	78828624	0.00095753	0.116009	0.897351
KF	AX-110970921	2B	95738751	3.00753e-06	0.159064	0.168952
YY	AX-110653326	2B	164896979	0.000863866	0.116945	0.897351
YY	AX-95098448	2B	164897144	0.000979633	0.115802	0.897351
YY	AX-108825796	2B	164897625	0.000655248	0.119469	0.897351
YY	AX-111499152	2B	164899378	0.000668474	0.119286	0.897351
YY	AX-111642329	2B	164903818	0.000863866	0.116945	0.897351
YY	AX-110954775	2B	164907658	0.000863866	0.116945	0.897351
YY	AX-111522868	2B	164908417	0.000863866	0.116945	0.897351
YY	AX-108823100	2B	164932149	0.000863866	0.116945	0.897351
YY	AX-109994039	2B	164932844	0.000863866	0.116945	0.897351
YY	AX-110407930	2B	164933503	0.00087571	0.116821	0.897351
YY	AX-110004064	2B	164937928	0.000655248	0.119469	0.897351
YY	AX-109640643	2B	165072463	0.000845658	0.117139	0.897351
YY	AX-108746505	2B	165112779	0.00062669	0.119877	0.897351
YY	AX-108798880	2B	165113254	0.000845658	0.117139	0.897351
YY	AX-110966242	2B	165115254	0.000451723	0.122886	0.897351
YY	AX-110499979	2B	165122826	0.000863866	0.116945	0.897351
YY	AX-110917646	2B	165138303	0.000655248	0.119469	0.897351
YY	AX-109312097	2B	435684024	0.00085548	0.117034	0.897351
YY	AX-109312587	2B	457379337	0.00028696	0.127086	0.897351
YY	AX-109302864	2B	458020158	0.000681119	0.119115	0.897351
YY	AX-108740743	2B	458323235	0.00075477	0.118176	0.897351
YY	AX-111724913	2B	460827842	0.000391708	0.124202	0.897351
YY	AX-110431393	2B	462901651	0.000772443	0.117965	0.897351
YY	AX-108842644	2B	464636930	0.000668743	0.119282	0.897351
YY	AX-111703098	2B	467875381	0.000668743	0.119282	0.897351
YY	AX-109996229	2B	469616595	0.000429153	0.123359	0.897351
YY	AX-108808035	2B	472250055	0.000469474	0.122531	0.897351
YY	AX-111778463	2B	472356066	0.000447648	0.12297	0.897351
YY	AX-110591754	2B	473966842	0.000469474	0.122531	0.897351
YY	AX-109450614	2B	475608029	0.000848081	0.117113	0.897351
KF	AX-109274500	2B	746095564	0.000781595	0.105185	0.879964
KF	AX-111087936	2B	777308839	0.000668718	0.10663	0.846964
KF	AX-111611520	2D	15442231	0.000179369	0.118994	0.706961
KF	AX-109368259	2D	15604344	0.00072285	0.105908	0.850412
KF	AX-110587833	2D	32455751	0.000728419	0.105837	0.852501
KF	AX-111283000	2D	37961972	0.000717182	0.105981	0.850412
YY	AX-95104146	2D	50470803	0.00095753	0.116009	0.897351
KF	AX-111589892	2D	86079836	0.000907868	0.103801	0.933614
SQ	AX-110914420	3A	15348646	0.00096377	0.0582146	0.366438
SQ	AX-108874389	3A	15363095	0.00093019	0.058558	0.361905
SQ	AX-110064753	3A	15423333	0.00096377	0.0582146	0.366438
YY	AX-108847051	3A	16070421	0.000798285	0.117665	0.897351
SQ	AX-108875089	3A	17552374	0.000896605	0.0589143	0.361905
SQ	AX-110569041	3A	17564323	0.000854666	0.0593788	0.361905
SQ	AX-109058510	3A	17960925	0.000941035	0.0584457	0.363327
SQ	AX-109843212	3A	18747722	0.000788426	0.0601621	0.361905
SQ	AX-109484907	3A	18751927	0.000854795	0.0593774	0.361905
SQ	AX-94863805	3A	144473416	0.000610886	0.0626476	0.361905
KF	AX-110035854	3A	202587965	0.000457446	0.110168	0.803054
KF	AX-110486645	3A	502941109	0.000165925	0.119735	0.703478
KF	AX-111037462	3A	595968151	0.000800649	0.104962	0.886507
KF	AX-110963293	3A	595982187	0.00048829	0.109558	0.823127
KF	AX-109110362	3A	596116982	0.000695432	0.106267	0.846964
KF	AX-111055674	3A	596153888	0.000855568	0.104348	0.919189
KF	AX-109921440	3A	596154418	0.000923304	0.103645	0.935737
KF	AX-111778082	3A	596233297	0.000871643	0.104177	0.921169
KF	AX-111052976	3A	596257414	0.000674585	0.106549	0.846964
KF	AX-110713850	3A	596289021	0.000695432	0.106267	0.846964
KF	AX-111490717	3A	596360212	0.000695432	0.106267	0.846964
KF	AX-109897375	3A	705955293	0.000837589	0.104545	0.909234
KF	AX-94987631	3A	731220289	6.50097e-05	0.128719	0.556374
YY	AX-111465892	3B	10301481	0.000927068	0.116303	0.897351
KF	AX-110514014	3B	263249368	0.000516501	0.109034	0.823127
KF	AX-109894371	3B	263250798	0.000516501	0.109034	0.823127
KF	AX-109344506	3B	263251087	0.000516501	0.109034	0.823127
KF	AX-109347518	3B	263251133	0.000441696	0.110495	0.803054
KF	AX-110922471	3B	376625452	9.36673e-06	0.147698	0.288278
KF	AX-95069510	3B	400373039	0.000976416	0.10313	0.945673
KF	AX-109359598	3B	404801032	0.000316429	0.113625	0.748457
YY	AX-108861017	3B	679198055	0.000695285	0.118926	0.897351
YY	AX-94568844	3B	737764644	0.000820467	0.117415	0.897351
SQ	AX-110526198	3B	825341801	0.00083679	0.0595839	0.361905
KF	AX-94729264	3D	40526440	6.58422e-10	0.248435	7.39757e-05
SQ	AX-94729264	3D	40526440	1.56824e-05	0.0995393	0.359811
YY	AX-109422875	3D	52650282	0.000891066	0.116663	0.897351
YY	AX-108814800	3D	57034968	0.000446096	0.123002	0.897351
YY	AX-110234451	3D	57095551	0.000522295	0.12155	0.897351
YY	AX-111086522	3D	59813976	0.000702337	0.118834	0.897351
YY	AX-110834607	3D	454744784	0.00089359	0.116637	0.897351
KF	AX-108739707	4A	451704	0.000452466	0.11027	0.803054
KF	AX-108756659	4A	1688925	0.000362831	0.112339	0.787491
KF	AX-111713301	4A	413306147	0.000116217	0.123133	0.557485
SQ	AX-110541173	4A	572558552	0.000523984	0.0641484	0.361905
KF	AX-109551612	4A	621819009	0.000196724	0.118117	0.724675
KF	AX-110407607	4A	627367660	0.000781025	0.105191	0.879964
KF	AX-108851891	4A	669454046	0.00063324	0.107137	0.846964
KF	AX-110028010	4A	694968010	9.64774e-05	0.124918	0.557485
KF	AX-108912427	4A	699571654	4.35117e-10	0.253052	7.39757e-05
SQ	AX-108912427	4A	699571654	8.40671e-06	0.106024	0.359811
SQ	AX-111679440	4A	718835673	0.00052474	0.0641343	0.361905
SQ	AX-94453429	4A	718836253	0.000342775	0.0683213	0.359811
KF	AX-109348034	4B	11987531	0.000504989	0.109244	0.823127
KF	AX-109074448	4B	12116835	0.000103485	0.124245	0.557485
KF	AX-108851428	4B	12132281	0.000504989	0.109244	0.823127
KF	AX-110463307	4B	14385998	0.000375732	0.112011	0.789059
KF	AX-110470638	4B	14387770	0.000932481	0.103554	0.936917
KF	AX-111738912	4B	14391062	0.000269024	0.115155	0.736152
KF	AX-108933020	4B	14391626	0.000279179	0.114805	0.736152
KF	AX-109917601	4B	14402975	7.37886e-05	0.127497	0.556374
KF	AX-111479123	4B	14490156	3.06018e-05	0.136038	0.556374
KF	AX-109026107	4B	14535053	3.46735e-05	0.134819	0.556374
KF	AX-109831968	4B	14537081	4.91204e-05	0.131432	0.556374
KF	AX-109032534	4B	14541909	6.11639e-05	0.129308	0.556374
KF	AX-110927844	4B	14542301	9.99894e-05	0.124575	0.557485
KF	AX-110473522	4B	14583784	9.18495e-05	0.12539	0.557485
KF	AX-110591473	4B	14584991	9.99894e-05	0.124575	0.557485
KF	AX-111467655	4B	14585234	9.28945e-05	0.125281	0.557485
KF	AX-110432822	4B	14589009	9.99894e-05	0.124575	0.557485
KF	AX-110400483	4B	14654168	7.37886e-05	0.127497	0.556374
KF	AX-111620933	4B	14657877	7.37886e-05	0.127497	0.556374
KF	AX-110472816	4B	15260080	0.000116761	0.123089	0.557485
KF	AX-89310573	4B	15260909	7.37886e-05	0.127497	0.556374
KF	AX-109349892	4B	15268472	7.42802e-05	0.127433	0.556374
KF	AX-110534558	4B	15269961	9.99894e-05	0.124575	0.557485
KF	AX-109996481	4B	15369676	0.00022393	0.116889	0.736152
KF	AX-94817844	4B	27520612	0.000668207	0.106637	0.846964
KF	AX-110918439	4B	670399775	0.000985687	0.103042	0.945673
SQ	AX-109847855	4D	500023674	0.000716966	0.0610863	0.361905
SQ	AX-109623019	5A	492890942	6.98973e-05	0.0842282	0.359811
SQ	AX-95112173	5A	495883080	0.000352704	0.0680395	0.359811
KF	AX-110549899	5A	547505636	0.000924469	0.103633	0.935737
KF	AX-109441723	5A	547509935	0.000457341	0.11017	0.803054
KF	AX-109814839	5A	547510581	0.000457341	0.11017	0.803054
KF	AX-109515251	5A	547636546	0.000363374	0.112325	0.787491
KF	AX-111060165	5A	547652536	0.000554934	0.108365	0.832013
KF	AX-86178846	5A	548625766	0.000299024	0.114158	0.736152
KF	AX-89631445	5A	548626293	0.000301989	0.114065	0.736152
KF	AX-111755756	5A	549145492	0.000972051	0.103171	0.945673
KF	AX-109939358	5A	549151932	0.000972051	0.103171	0.945673
KF	AX-111010850	5A	549160258	0.000766178	0.105369	0.879964
KF	AX-109379942	5A	549160416	9.86485e-06	0.147184	0.288278
KF	AX-110398252	5A	549162546	0.000232353	0.11654	0.736152
KF	AX-111732643	5A	549165055	0.000514287	0.109074	0.823127
KF	AX-109356170	5A	549185963	0.000514287	0.109074	0.823127
KF	AX-94734537	5A	549188525	0.000657967	0.106781	0.846964
KF	AX-110660428	5A	549190120	0.0006094	0.107493	0.832013
KF	AX-111117201	5A	549191742	0.0006094	0.107493	0.832013
KF	AX-109888300	5A	549193497	0.0006094	0.107493	0.832013
KF	AX-110634542	5A	549193732	0.000545186	0.10853	0.832013
KF	AX-111754451	5A	549200754	0.0006094	0.107493	0.832013
KF	AX-110472228	5A	549204038	4.2309e-05	0.132881	0.556374
KF	AX-110905938	5A	549211459	4.2309e-05	0.132881	0.556374
KF	AX-111506162	5A	549215707	0.0006094	0.107493	0.832013
KF	AX-110505195	5A	549216975	0.000446425	0.110396	0.803054
KF	AX-110905005	5A	549280172	0.0006094	0.107493	0.832013
KF	AX-109072560	5A	549334347	0.0006094	0.107493	0.832013
KF	AX-110121838	5A	549336430	0.000860785	0.104292	0.919189
KF	AX-110373243	5A	549340660	1.02633e-05	0.146791	0.288278
KF	AX-110476310	5A	549345396	0.000147588	0.120851	0.650275
KF	AX-111058802	5A	549348497	0.000105009	0.124105	0.557485
KF	AX-109081161	5A	549384071	0.000241976	0.116156	0.736152
KF	AX-110440665	5A	549389934	0.000406406	0.111275	0.797068
KF	AX-111212215	5A	549900744	6.47634e-05	0.128756	0.556374
KF	AX-110657845	5A	550251710	6.56828e-05	0.12862	0.556374
KF	AX-111674434	5A	552103464	6.23781e-05	0.129118	0.556374
KF	AX-111086828	5A	552155591	6.04614e-05	0.12942	0.556374
KF	AX-110067131	5A	552208450	0.000954147	0.103342	0.945673
KF	AX-89560971	5A	552750312	3.85487e-05	0.133787	0.556374
SQ	AX-108908049	5A	552963875	0.000974854	0.0581039	0.368161
SQ	AX-108759714	5A	553064045	0.000974854	0.0581039	0.368161
KF	AX-110931014	5A	650240330	8.61357e-05	0.126007	0.557485
KF	AX-112289745	5B	78708064	9.32955e-07	0.170952	0.0698802
SQ	AX-110051197	5B	387308892	0.000949169	0.0583624	0.365212
SQ	AX-111110238	5B	387310492	0.000848722	0.0594465	0.361905
SQ	AX-109979831	5B	387313399	0.000848722	0.0594465	0.361905
SQ	AX-111761123	5B	387348283	0.000848722	0.0594465	0.361905
SQ	AX-110460844	5B	387350515	0.000293436	0.0698574	0.359811
SQ	AX-111504219	5B	387355065	0.000848722	0.0594465	0.361905
SQ	AX-110746543	5B	387357520	0.000848722	0.0594465	0.361905
SQ	AX-109993880	5B	387358938	0.000848722	0.0594465	0.361905
SQ	AX-111560058	5B	387362668	0.000928946	0.0585709	0.361905
SQ	AX-111151055	5B	387364605	0.000792575	0.0601111	0.361905
SQ	AX-109880254	5B	387367526	0.000848722	0.0594465	0.361905
SQ	AX-94583274	5B	387367538	0.000813902	0.0598532	0.361905
SQ	AX-109313820	5B	387369432	0.000848722	0.0594465	0.361905
SQ	AX-111627183	5B	387369735	0.000753938	0.060597	0.361905
SQ	AX-110033886	5B	387396965	0.000848722	0.0594465	0.361905
SQ	AX-110668192	5B	387397132	0.000486372	0.0648785	0.361905
SQ	AX-109962575	5B	387397880	0.000664371	0.0618286	0.361905
SQ	AX-109374629	5B	387402576	0.000848722	0.0594465	0.361905
SQ	AX-108788286	5B	387402803	0.000928946	0.0585709	0.361905
SQ	AX-110571781	5B	387402849	0.000848722	0.0594465	0.361905
SQ	AX-111077770	5B	387427949	0.000848722	0.0594465	0.361905
SQ	AX-109354931	5B	387538510	0.000479684	0.0650143	0.361905
SQ	AX-110956143	5B	387584582	0.000848722	0.0594465	0.361905
SQ	AX-111547026	5B	387659280	0.000848722	0.0594465	0.361905
SQ	AX-110551446	5B	387705819	0.000848722	0.0594465	0.361905
SQ	AX-111511478	5B	387728689	0.000365443	0.0676896	0.359811
SQ	AX-109559892	5B	387731747	0.000734463	0.0608516	0.361905
SQ	AX-110517857	5B	387732648	0.000522252	0.0641808	0.361905
SQ	AX-110609702	5B	387734694	0.000848722	0.0594465	0.361905
SQ	AX-111743344	5B	387736318	0.000782354	0.0602373	0.361905
SQ	AX-108845000	5B	387736916	0.00065716	0.061935	0.361905
SQ	AX-109977098	5B	387739916	0.000848722	0.0594465	0.361905
SQ	AX-110393441	5B	387743830	0.000640154	0.0621908	0.361905
SQ	AX-109332758	5B	387744128	0.000848722	0.0594465	0.361905
SQ	AX-111133998	5B	387746306	0.000848722	0.0594465	0.361905
SQ	AX-109480117	5B	387746817	0.000848722	0.0594465	0.361905
SQ	AX-110114824	5B	387747057	0.000551911	0.0636401	0.361905
SQ	AX-108763984	5B	387747204	0.000848722	0.0594465	0.361905
SQ	AX-111019514	5B	387755566	0.000848722	0.0594465	0.361905
SQ	AX-111555040	5B	387758777	0.000928946	0.0585709	0.361905
SQ	AX-109499614	5B	387761482	0.000848722	0.0594465	0.361905
SQ	AX-109921803	5B	387761603	0.000848722	0.0594465	0.361905
SQ	AX-109840625	5B	387762605	0.000848722	0.0594465	0.361905
SQ	AX-110449853	5B	387762735	0.00094536	0.0584013	0.364371
SQ	AX-108926487	5B	387764091	0.000848722	0.0594465	0.361905
SQ	AX-108861808	5B	387764240	0.000845757	0.0594805	0.361905
SQ	AX-109441188	5B	387765973	0.000928946	0.0585709	0.361905
SQ	AX-111127700	5B	387769846	0.000848722	0.0594465	0.361905
SQ	AX-109816133	5B	387771225	0.000848722	0.0594465	0.361905
SQ	AX-108784918	5B	387771381	0.000994504	0.0579109	0.374323
SQ	AX-109273628	5B	387772132	0.000928946	0.0585709	0.361905
SQ	AX-111450071	5B	387772166	0.000848722	0.0594465	0.361905
SQ	AX-109584740	5B	387866147	0.000848722	0.0594465	0.361905
SQ	AX-108866112	5B	387867293	0.000848722	0.0594465	0.361905
SQ	AX-110612631	5B	387867405	0.000848722	0.0594465	0.361905
SQ	AX-110937663	5B	387892654	0.000848722	0.0594465	0.361905
SQ	AX-110515631	5B	387892975	0.000928946	0.0585709	0.361905
SQ	AX-110377335	5B	387894720	0.000576898	0.063207	0.361905
SQ	AX-111662898	5B	387898465	0.000848722	0.0594465	0.361905
SQ	AX-110565088	5B	387901215	0.000720508	0.0610383	0.361905
SQ	AX-111075065	5B	387901595	0.000719826	0.0610475	0.361905
SQ	AX-110591344	5B	387904594	0.000928946	0.0585709	0.361905
SQ	AX-111054096	5B	387904983	0.000541535	0.0638258	0.361905
SQ	AX-109937087	5B	387906505	0.000848722	0.0594465	0.361905
SQ	AX-110508358	5B	387950602	0.000819234	0.0597898	0.361905
SQ	AX-111240943	5B	387952934	0.000848722	0.0594465	0.361905
SQ	AX-111552655	5B	387956006	0.000848722	0.0594465	0.361905
SQ	AX-110471566	5B	387979093	0.000848722	0.0594465	0.361905
SQ	AX-110496366	5B	387979428	0.000848722	0.0594465	0.361905
SQ	AX-109271279	5B	387981662	0.000848722	0.0594465	0.361905
SQ	AX-110529153	5B	387981854	0.000848722	0.0594465	0.361905
SQ	AX-109326092	5B	387981898	0.000479684	0.0650143	0.361905
SQ	AX-111530948	5B	387989909	0.000953687	0.0583164	0.365698
SQ	AX-110907119	5B	388010139	0.000936704	0.0584904	0.363327
SQ	AX-108771420	5B	388010356	0.000848722	0.0594465	0.361905
SQ	AX-108912057	5B	388017442	0.000504896	0.064512	0.361905
SQ	AX-110666878	5B	388042157	0.000822642	0.0597495	0.361905
SQ	AX-109615890	5B	388057862	0.000848722	0.0594465	0.361905
SQ	AX-109040704	5B	388075487	0.000829708	0.0596664	0.361905
SQ	AX-109845624	5B	388076103	0.000928946	0.0585709	0.361905
SQ	AX-110008702	5B	388078160	0.000479684	0.0650143	0.361905
SQ	AX-110058251	5B	388150080	0.000848722	0.0594465	0.361905
SQ	AX-110449619	5B	388171600	0.000928946	0.0585709	0.361905
SQ	AX-110712522	5B	388171727	0.000848722	0.0594465	0.361905
SQ	AX-108799999	5B	388198036	0.000928946	0.0585709	0.361905
SQ	AX-111613923	5B	388247904	0.000848722	0.0594465	0.361905
SQ	AX-108798403	5B	388248280	0.000485046	0.0649052	0.361905
SQ	AX-109816408	5B	388249066	0.000848722	0.0594465	0.361905
SQ	AX-111642691	5B	388259865	0.000428022	0.0661334	0.36032
SQ	AX-110488250	5B	388260177	0.000848722	0.0594465	0.361905
SQ	AX-109414555	5B	388284252	0.000848722	0.0594465	0.361905
SQ	AX-108927983	5B	388285974	0.000848722	0.0594465	0.361905
SQ	AX-111761974	5B	388286140	0.000928946	0.0585709	0.361905
SQ	AX-109355809	5B	388288798	0.000848722	0.0594465	0.361905
SQ	AX-110013074	5B	388289735	0.000848722	0.0594465	0.361905
SQ	AX-109878839	5B	388290068	0.000848722	0.0594465	0.361905
SQ	AX-110475155	5B	388291642	0.000848722	0.0594465	0.361905
SQ	AX-110399453	5B	388310645	0.000848722	0.0594465	0.361905
SQ	AX-111089277	5B	388313632	0.000848722	0.0594465	0.361905
SQ	AX-109819133	5B	388316825	0.000848722	0.0594465	0.361905
SQ	AX-109985241	5B	388316962	0.000928946	0.0585709	0.361905
SQ	AX-109464548	5B	388317057	0.000848722	0.0594465	0.361905
SQ	AX-111211811	5B	388318051	0.000848722	0.0594465	0.361905
SQ	AX-109861772	5B	388318697	0.000928946	0.0585709	0.361905
SQ	AX-111631314	5B	388320636	0.000639271	0.0622042	0.361905
SQ	AX-110186490	5B	388328879	0.000848722	0.0594465	0.361905
SQ	AX-109583014	5B	388338454	0.000928946	0.0585709	0.361905
SQ	AX-111668153	5B	388370196	0.000848722	0.0594465	0.361905
SQ	AX-111529818	5B	388388274	0.000848722	0.0594465	0.361905
SQ	AX-111674082	5B	388403689	0.000479684	0.0650143	0.361905
SQ	AX-108821056	5B	388404141	0.000928946	0.0585709	0.361905
SQ	AX-110396400	5B	388404187	0.000479684	0.0650143	0.361905
SQ	AX-110395014	5B	388479481	0.000637998	0.0622237	0.361905
SQ	AX-109530939	5B	388538347	0.000593286	0.0629332	0.361905
SQ	AX-108776101	5B	388540045	0.000690252	0.0614561	0.361905
SQ	AX-111621782	5B	388544254	0.000757687	0.0605488	0.361905
SQ	AX-109270690	5B	388544600	0.000757687	0.0605488	0.361905
SQ	AX-111582589	5B	388608324	0.000741566	0.060758	0.361905
SQ	AX-111175255	5B	388611090	0.000741566	0.060758	0.361905
SQ	AX-111096939	5B	388677889	0.000741566	0.060758	0.361905
SQ	AX-110568910	5B	388680764	0.000381154	0.0672747	0.359811
SQ	AX-108926251	5B	388682087	0.000741566	0.060758	0.361905
SQ	AX-109349739	5B	388683978	0.000741566	0.060758	0.361905
SQ	AX-110158359	5B	388796406	0.000780599	0.0602591	0.361905
SQ	AX-111114405	5B	388833146	0.000959679	0.0582558	0.366438
SQ	AX-109615462	5B	388911353	0.000622723	0.0624602	0.361905
SQ	AX-109338502	5B	388914133	0.000741566	0.060758	0.361905
SQ	AX-110514161	5B	388914276	0.000627369	0.0623877	0.361905
SQ	AX-109927934	5B	388914803	0.000381154	0.0672747	0.359811
SQ	AX-109410640	5B	388969620	0.000742405	0.060747	0.361905
SQ	AX-108782628	5B	388972959	0.000699462	0.061327	0.361905
SQ	AX-109596453	5B	388973233	0.000731468	0.0608914	0.361905
SQ	AX-109915408	5B	388982404	0.000446589	0.0657161	0.36032
SQ	AX-110935976	5B	389004858	0.000416752	0.0663958	0.359811
SQ	AX-111585358	5B	389005775	0.000741566	0.060758	0.361905
SQ	AX-109468755	5B	389005899	0.000741566	0.060758	0.361905
SQ	AX-110736785	5B	389133866	0.000280547	0.0703022	0.359811
SQ	AX-110186077	5B	389143515	0.000741566	0.060758	0.361905
SQ	AX-110375591	5B	389172751	0.000645714	0.0621064	0.361905
SQ	AX-111593167	5B	389239183	0.000741566	0.060758	0.361905
SQ	AX-109036738	5B	389339239	0.000952488	0.0583286	0.365698
SQ	AX-110526215	5B	389398206	0.000741566	0.060758	0.361905
SQ	AX-109391929	5B	389474225	0.000741566	0.060758	0.361905
SQ	AX-111593963	5B	389474446	0.000741566	0.060758	0.361905
SQ	AX-108855687	5B	389479635	0.00048577	0.0648906	0.361905
SQ	AX-111588254	5B	389491330	0.000741566	0.060758	0.361905
SQ	AX-109878524	5B	389724541	0.000788297	0.0601637	0.361905
SQ	AX-111461209	5B	389806901	0.000837808	0.0595722	0.361905
SQ	AX-109924888	5B	389808285	0.000741566	0.060758	0.361905
SQ	AX-108824842	5B	389822525	0.000444148	0.0657699	0.36032
SQ	AX-109344494	5B	389823180	0.000630045	0.0623461	0.361905
SQ	AX-111235349	5B	389826255	0.000741566	0.060758	0.361905
SQ	AX-108736209	5B	389874039	0.000619655	0.0625084	0.361905
SQ	AX-108771448	5B	389901454	0.000741566	0.060758	0.361905
SQ	AX-108840706	5B	389950692	0.000788297	0.0601637	0.361905
SQ	AX-110746233	5B	390045084	0.000741566	0.060758	0.361905
SQ	AX-111570486	5B	390138690	0.000788297	0.0601637	0.361905
SQ	AX-111548612	5B	390138723	0.000741566	0.060758	0.361905
SQ	AX-109868957	5B	390179340	0.000741566	0.060758	0.361905
SQ	AX-110978418	5B	390237954	0.000556195	0.0635644	0.361905
SQ	AX-111548951	5B	390238174	0.000741566	0.060758	0.361905
SQ	AX-108882147	5B	390239764	0.000741566	0.060758	0.361905
SQ	AX-109512563	5B	390260619	0.000709546	0.0611876	0.361905
SQ	AX-109327667	5B	390539599	0.000741566	0.060758	0.361905
SQ	AX-109522205	5B	390550828	0.000741566	0.060758	0.361905
SQ	AX-111097375	5B	390551881	0.000741566	0.060758	0.361905
SQ	AX-109596245	5B	390637842	0.000741566	0.060758	0.361905
SQ	AX-111486444	5B	390638198	0.000741566	0.060758	0.361905
SQ	AX-109936941	5B	390694228	0.000741566	0.060758	0.361905
SQ	AX-109360686	5B	390694620	0.000397085	0.0668715	0.359811
SQ	AX-109284459	5B	390701008	0.000741566	0.060758	0.361905
SQ	AX-111127443	5B	390713822	0.000741566	0.060758	0.361905
SQ	AX-111640589	5B	390748519	0.000284006	0.0701808	0.359811
SQ	AX-111574979	5B	391011120	0.000741566	0.060758	0.361905
SQ	AX-111231781	5B	391052610	0.000646707	0.0620914	0.361905
SQ	AX-108777339	5B	391129452	0.000788297	0.0601637	0.361905
SQ	AX-109847009	5B	391146191	0.000676617	0.0616505	0.361905
SQ	AX-110085998	5B	391147147	0.000788297	0.0601637	0.361905
SQ	AX-109533905	5B	391150811	0.000940194	0.0584544	0.363327
SQ	AX-109001772	5B	391150868	0.000751505	0.0606284	0.361905
SQ	AX-108825840	5B	391152439	0.000741566	0.060758	0.361905
SQ	AX-109818703	5B	391156480	0.000741566	0.060758	0.361905
SQ	AX-109418735	5B	391644726	0.000874465	0.0591567	0.361905
SQ	AX-108969498	5B	391674737	0.000691087	0.0614443	0.361905
SQ	AX-110558224	5B	391751017	0.00082385	0.0597352	0.361905
SQ	AX-111134264	5B	391765029	0.000722188	0.0610156	0.361905
SQ	AX-109306732	5B	391820038	0.000922401	0.0586394	0.361905
SQ	AX-110385304	5B	391832599	0.000690252	0.0614561	0.361905
SQ	AX-109486908	5B	391874855	5.00516e-05	0.0876207	0.359811
SQ	AX-109403724	5B	391877712	0.000177507	0.0748541	0.359811
SQ	AX-109054121	5B	391879029	0.000422731	0.0662557	0.359811
SQ	AX-110127467	5B	391879815	0.000422731	0.0662557	0.359811
SQ	AX-110673101	5B	391879993	0.000172565	0.075136	0.359811
SQ	AX-111546340	5B	391882461	0.000422731	0.0662557	0.359811
SQ	AX-109314178	5B	391903425	0.000422731	0.0662557	0.359811
SQ	AX-110389287	5B	391903643	0.000474256	0.0651259	0.361905
SQ	AX-111697471	5B	391914327	0.000422731	0.0662557	0.359811
SQ	AX-111017377	5B	391916381	0.000422731	0.0662557	0.359811
SQ	AX-110456475	5B	391948146	0.00063525	0.0622658	0.361905
SQ	AX-111018469	5B	391968178	0.000422731	0.0662557	0.359811
SQ	AX-110498516	5B	391974332	0.000422731	0.0662557	0.359811
SQ	AX-110951709	5B	391974650	0.000483714	0.0649322	0.361905
SQ	AX-108884452	5B	391994694	0.000688535	0.0614804	0.361905
SQ	AX-110434973	5B	392052041	0.000841713	0.059527	0.361905
SQ	AX-109385238	5B	392139731	0.000422731	0.0662557	0.359811
SQ	AX-108787260	5B	392141389	0.000422731	0.0662557	0.359811
SQ	AX-111487027	5B	392144895	0.000419538	0.0663303	0.359811
SQ	AX-110978169	5B	392145125	0.00046502	0.065319	0.36032
SQ	AX-109887089	5B	392145658	0.000422731	0.0662557	0.359811
SQ	AX-108983699	5B	392148906	0.000422731	0.0662557	0.359811
SQ	AX-111479233	5B	392149462	0.000422731	0.0662557	0.359811
SQ	AX-109297356	5B	392152812	0.000422731	0.0662557	0.359811
SQ	AX-108876434	5B	392215277	0.000422731	0.0662557	0.359811
SQ	AX-109288226	5B	392215994	0.000422731	0.0662557	0.359811
SQ	AX-109374435	5B	392216339	0.00046502	0.065319	0.36032
SQ	AX-111134666	5B	392217929	0.000422731	0.0662557	0.359811
SQ	AX-110157955	5B	392219187	0.000422731	0.0662557	0.359811
SQ	AX-110941968	5B	392266086	0.000422731	0.0662557	0.359811
SQ	AX-108828225	5B	392267252	0.000422731	0.0662557	0.359811
SQ	AX-109394098	5B	392267635	0.000422731	0.0662557	0.359811
SQ	AX-111499817	5B	392269663	0.000422731	0.0662557	0.359811
SQ	AX-110640296	5B	392273366	0.00041434	0.0664529	0.359811
SQ	AX-108864268	5B	392410223	0.000510884	0.0643964	0.361905
SQ	AX-109950063	5B	392428603	0.000457235	0.0654847	0.36032
SQ	AX-109512970	5B	392498300	0.000457235	0.0654847	0.36032
SQ	AX-110396411	5B	392501592	0.000488648	0.0648327	0.361905
SQ	AX-109416401	5B	392583905	0.000457235	0.0654847	0.36032
SQ	AX-111530742	5B	392667721	0.000717533	0.0610786	0.361905
SQ	AX-110736230	5B	392725214	0.000457235	0.0654847	0.36032
SQ	AX-111035786	5B	392731666	0.000457235	0.0654847	0.36032
SQ	AX-110506922	5B	392898707	0.000502387	0.0645608	0.361905
SQ	AX-110516745	5B	392899521	0.000457235	0.0654847	0.36032
SQ	AX-109878848	5B	392921732	0.000457235	0.0654847	0.36032
SQ	AX-110953718	5B	393176788	0.000454666	0.06554	0.36032
SQ	AX-110735604	5B	393396769	0.000668562	0.0617673	0.361905
SQ	AX-110362123	5B	393514030	0.000526793	0.064096	0.361905
SQ	AX-110500517	5B	393514955	0.000422731	0.0662557	0.359811
SQ	AX-110071736	5B	393515593	0.000440914	0.0658417	0.36032
SQ	AX-111171965	5B	393515905	0.000517894	0.0642629	0.361905
SQ	AX-111451969	5B	393563168	0.000422731	0.0662557	0.359811
SQ	AX-108942709	5B	393564376	0.000422731	0.0662557	0.359811
SQ	AX-109506536	5B	393573623	0.000690252	0.0614561	0.361905
SQ	AX-111622224	5B	393573732	0.000422731	0.0662557	0.359811
SQ	AX-109929757	5B	393573901	0.000422731	0.0662557	0.359811
SQ	AX-108797401	5B	393575474	0.000422731	0.0662557	0.359811
SQ	AX-111512524	5B	393575524	0.00046502	0.065319	0.36032
SQ	AX-111749893	5B	393576040	0.00046502	0.065319	0.36032
SQ	AX-109909350	5B	393577441	0.000422731	0.0662557	0.359811
SQ	AX-109490989	5B	393580722	0.000223858	0.0725425	0.359811
SQ	AX-108754020	5B	393609997	0.000422731	0.0662557	0.359811
SQ	AX-109351984	5B	393616931	0.000422731	0.0662557	0.359811
SQ	AX-111472598	5B	393663400	0.000208407	0.0732541	0.359811
SQ	AX-108987274	5B	393666667	0.000782775	0.0602321	0.361905
SQ	AX-109010303	5B	393668858	0.000422731	0.0662557	0.359811
SQ	AX-110056377	5B	393669471	0.00041434	0.0664529	0.359811
SQ	AX-109923036	5B	393669509	0.000422731	0.0662557	0.359811
SQ	AX-111119152	5B	393714667	0.000422731	0.0662557	0.359811
SQ	AX-108894827	5B	393720876	0.000690252	0.0614561	0.361905
SQ	AX-110376396	5B	393747626	0.00046502	0.065319	0.36032
SQ	AX-109927513	5B	393757468	0.000422731	0.0662557	0.359811
SQ	AX-109281809	5B	393790651	0.000422731	0.0662557	0.359811
SQ	AX-111677888	5B	393790755	0.000457963	0.0654691	0.36032
SQ	AX-110470348	5B	393824940	0.00046502	0.065319	0.36032
SQ	AX-89522631	5B	393825559	0.000355324	0.0679665	0.359811
SQ	AX-109308318	5B	393825893	0.000690252	0.0614561	0.361905
SQ	AX-110651119	5B	393826321	0.00041434	0.0664529	0.359811
SQ	AX-109995446	5B	393828304	0.000422731	0.0662557	0.359811
SQ	AX-109450764	5B	393828339	0.00046502	0.065319	0.36032
SQ	AX-111673237	5B	393828867	0.000422731	0.0662557	0.359811
SQ	AX-94631526	5B	393829791	0.000407545	0.0666156	0.359811
SQ	AX-108774619	5B	393831577	0.000422731	0.0662557	0.359811
SQ	AX-110366399	5B	393835122	0.00046502	0.065319	0.36032
SQ	AX-108840784	5B	393843097	0.000483854	0.0649294	0.361905
SQ	AX-110425962	5B	393844060	0.000757687	0.0605488	0.361905
SQ	AX-111462154	5B	393844427	0.000422731	0.0662557	0.359811
SQ	AX-110540521	5B	393844652	0.000422731	0.0662557	0.359811
SQ	AX-86169435	5B	393845702	0.00046502	0.065319	0.36032
SQ	AX-110112534	5B	393846460	0.000268929	0.0707213	0.359811
SQ	AX-108791429	5B	393846586	0.000236697	0.0719882	0.359811
SQ	AX-109481559	5B	393846706	0.000303004	0.06954	0.359811
SQ	AX-108784551	5B	393846741	0.000272895	0.0705762	0.359811
SQ	AX-108993058	5B	393846881	0.000261127	0.0710132	0.359811
SQ	AX-110039072	5B	393846929	0.000118645	0.0788892	0.359811
SQ	AX-111648827	5B	393889542	0.000236697	0.0719882	0.359811
SQ	AX-110005642	5B	393894034	0.000236697	0.0719882	0.359811
SQ	AX-108829613	5B	393894088	0.000169044	0.0753419	0.359811
SQ	AX-109926794	5B	393894137	0.000236697	0.0719882	0.359811
SQ	AX-109318115	5B	393895086	0.000391327	0.0670153	0.359811
SQ	AX-111643205	5B	393901206	0.000135391	0.0775639	0.359811
SQ	AX-109585517	5B	393901608	0.000261127	0.0710132	0.359811
SQ	AX-111834395	5B	393932693	0.000236697	0.0719882	0.359811
SQ	AX-108885332	5B	393953440	0.000246558	0.0715829	0.359811
SQ	AX-110971313	5B	393953490	0.000236697	0.0719882	0.359811
SQ	AX-109639872	5B	393954054	0.000236697	0.0719882	0.359811
SQ	AX-109375107	5B	393962573	0.000236697	0.0719882	0.359811
SQ	AX-109476209	5B	393983205	0.000383102	0.0672245	0.359811
SQ	AX-108725834	5B	393983506	0.000236697	0.0719882	0.359811
SQ	AX-94939814	5B	394010496	0.000261127	0.0710132	0.359811
SQ	AX-109536364	5B	394014022	0.000236697	0.0719882	0.359811
SQ	AX-109893704	5B	394014842	0.000905141	0.0588224	0.361905
SQ	AX-111491437	5B	394018241	0.000391327	0.0670153	0.359811
SQ	AX-110428967	5B	394018421	0.000391327	0.0670153	0.359811
SQ	AX-110932980	5B	394020615	0.000236697	0.0719882	0.359811
SQ	AX-109306911	5B	394021074	0.000236697	0.0719882	0.359811
SQ	AX-110438859	5B	394023351	0.000236697	0.0719882	0.359811
SQ	AX-108775541	5B	394025627	0.000236697	0.0719882	0.359811
SQ	AX-110074612	5B	394025705	0.000236697	0.0719882	0.359811
SQ	AX-111715290	5B	394026382	0.000236697	0.0719882	0.359811
SQ	AX-110396574	5B	394108759	0.000236697	0.0719882	0.359811
SQ	AX-109334189	5B	394109215	0.000236697	0.0719882	0.359811
SQ	AX-109927898	5B	394109463	0.000236697	0.0719882	0.359811
SQ	AX-109926446	5B	394121751	0.000236697	0.0719882	0.359811
SQ	AX-108752070	5B	394121875	0.000236697	0.0719882	0.359811
SQ	AX-108798221	5B	394122128	0.000236697	0.0719882	0.359811
SQ	AX-109410761	5B	394124412	0.000236697	0.0719882	0.359811
SQ	AX-111139678	5B	394184624	0.00031886	0.0690356	0.359811
SQ	AX-110380317	5B	394186940	0.00019407	0.0739642	0.359811
SQ	AX-110424073	5B	394248371	0.000236697	0.0719882	0.359811
SQ	AX-108863739	5B	394264560	0.000339774	0.0684081	0.359811
SQ	AX-108786164	5B	394265290	0.000231644	0.0722027	0.359811
SQ	AX-110441665	5B	394265804	0.000261127	0.0710132	0.359811
SQ	AX-110586607	5B	394266076	0.000235274	0.0720481	0.359811
SQ	AX-108843380	5B	394270546	0.000236697	0.0719882	0.359811
SQ	AX-111606017	5B	394414477	0.000391327	0.0670153	0.359811
SQ	AX-111123477	5B	394441466	0.000405445	0.0666664	0.359811
SQ	AX-110015742	5B	394479309	0.000236697	0.0719882	0.359811
SQ	AX-111778035	5B	394494357	0.000235608	0.072034	0.359811
SQ	AX-110968967	5B	394537477	0.000236697	0.0719882	0.359811
SQ	AX-111528015	5B	394575815	0.000236697	0.0719882	0.359811
SQ	AX-110103802	5B	394629354	0.000236697	0.0719882	0.359811
SQ	AX-111672195	5B	394677083	0.000236697	0.0719882	0.359811
SQ	AX-110591606	5B	394678569	0.000515005	0.0643177	0.361905
SQ	AX-110674454	5B	394689656	0.000236697	0.0719882	0.359811
SQ	AX-110158297	5B	394689807	0.000261127	0.0710132	0.359811
SQ	AX-111632362	5B	394690671	0.000236697	0.0719882	0.359811
SQ	AX-110023965	5B	394690909	0.000236697	0.0719882	0.359811
SQ	AX-110436014	5B	394695534	0.000125726	0.0783069	0.359811
SQ	AX-111632693	5B	394699706	0.00025542	0.0712324	0.359811
SQ	AX-111574898	5B	394699984	0.000236697	0.0719882	0.359811
SQ	AX-111666633	5B	394700291	0.000236697	0.0719882	0.359811
SQ	AX-108922183	5B	394701186	0.000261127	0.0710132	0.359811
SQ	AX-110523100	5B	394701327	0.000236697	0.0719882	0.359811
SQ	AX-108910712	5B	394701563	0.000526569	0.0641002	0.361905
SQ	AX-111667163	5B	394701656	0.000236697	0.0719882	0.359811
SQ	AX-111633967	5B	394706141	0.000261127	0.0710132	0.359811
SQ	AX-110050843	5B	394706252	0.000149739	0.0765547	0.359811
SQ	AX-110548616	5B	394725727	0.000403234	0.0667202	0.359811
SQ	AX-110388331	5B	394735428	0.000236697	0.0719882	0.359811
SQ	AX-109486399	5B	470602279	0.000397441	0.0668627	0.359811
SQ	AX-111709168	5B	470702761	0.000313074	0.0692166	0.359811
SQ	AX-111166407	5B	470708082	0.000627558	0.0623847	0.361905
SQ	AX-109017550	5B	470980925	0.000850742	0.0594235	0.361905
SQ	AX-109408845	5B	471086736	0.000262163	0.0709739	0.359811
SQ	AX-109314837	5B	471123846	0.000251806	0.0713738	0.359811
SQ	AX-110904978	5B	471307044	0.000442081	0.0658158	0.36032
SQ	AX-89441234	5B	471311891	0.000552655	0.0636269	0.361905
SQ	AX-109843548	5B	471400496	0.000363101	0.067753	0.359811
SQ	AX-108892836	5B	471403598	0.000363101	0.067753	0.359811
SQ	AX-111286004	5B	471430649	0.000332547	0.0686204	0.359811
SQ	AX-110506915	5B	473349466	0.000394194	0.0669434	0.359811
SQ	AX-110931839	5B	473443729	0.000776247	0.0603135	0.361905
SQ	AX-111456610	5B	473467987	0.000776247	0.0603135	0.361905
SQ	AX-109881267	5B	473471975	0.000985718	0.0579967	0.371639
SQ	AX-111140560	5B	473477723	0.000708164	0.0612066	0.361905
SQ	AX-108879462	5B	473627972	0.000940907	0.058447	0.363327
SQ	AX-112287481	5B	473642332	0.000100517	0.0805575	0.359811
SQ	AX-108908710	5B	473798491	0.000381925	0.0672548	0.359811
SQ	AX-111708401	5B	473871199	4.095e-05	0.0896676	0.359811
SQ	AX-86163737	5B	473871236	4.095e-05	0.0896676	0.359811
SQ	AX-94720324	5B	473871252	7.37801e-05	0.0836807	0.359811
SQ	AX-111062528	5B	476793848	5.33722e-05	0.0869668	0.359811
SQ	AX-111655341	5B	476890489	0.000928364	0.058577	0.361905
SQ	AX-110942750	5B	477606174	0.00010582	0.0800398	0.359811
SQ	AX-109853725	5B	477606394	0.000210531	0.0731532	0.359811
SQ	AX-111031578	5B	477613479	7.37523e-05	0.0836845	0.359811
SQ	AX-108775671	5B	477616114	0.000210531	0.0731532	0.359811
SQ	AX-110526231	5B	477616883	0.000409255	0.0665744	0.359811
SQ	AX-109971590	5B	477630507	0.000210531	0.0731532	0.359811
SQ	AX-111459293	5B	477630916	0.000210531	0.0731532	0.359811
KF	AX-108921926	5B	699558049	0.000385552	0.111769	0.794824
SQ	AX-111820017	5D	218945113	0.000408694	0.0665879	0.359811
SQ	AX-108816919	5D	219651429	0.000402898	0.0667284	0.359811
SQ	AX-110938031	5D	222686722	0.000280621	0.0702996	0.359811
SQ	AX-108731705	5D	225270546	0.000402898	0.0667284	0.359811
SQ	AX-111785526	5D	232007032	0.000411153	0.0665289	0.359811
SQ	AX-110121727	5D	234252400	0.000114878	0.0792135	0.359811
SQ	AX-89438182	5D	238177337	0.000114878	0.0792135	0.359811
SQ	AX-111643347	5D	240497119	0.000163132	0.0756977	0.359811
SQ	AX-108848982	5D	332040170	0.000848722	0.0594465	0.361905
SQ	AX-111188221	5D	335049453	0.000722188	0.0610156	0.361905
SQ	AX-94505455	5D	335235735	0.000533286	0.0639761	0.361905
KF	AX-95075283	5D	431203273	0.00085693	0.104334	0.919189
SQ	AX-108728656	5D	496411812	0.000671538	0.061724	0.361905
KF	AX-111106634	6A	490486081	0.000604846	0.107563	0.832013
YY	AX-109557802	6A	601398500	0.000456438	0.12279	0.897351
KF	AX-94936962	6A	611858549	0.000524208	0.108896	0.826619
SQ	AX-94936962	6A	611858549	0.00013861	0.0773283	0.359811
KF	AX-110485374	6A	612095745	0.000605329	0.107556	0.832013
KF	AX-94721617	6A	612097393	0.000605329	0.107556	0.832013
KF	AX-94975608	6A	612123809	6.31028e-05	0.129007	0.556374
KF	AX-95227189	6A	612123820	0.000119086	0.1229	0.557485
KF	AX-110960272	6A	612124237	0.000331432	0.113189	0.759947
KF	AX-111501276	6A	612124269	0.000161351	0.120001	0.697241
KF	AX-111084964	6B	462555585	1.36912e-05	0.143938	0.341832
SQ	AX-109305119	6B	479332942	0.000338347	0.0684497	0.359811
YY	AX-110421368	6B	556751602	0.000921235	0.11636	0.897351
KF	AX-109956643	6B	702249128	0.000447855	0.110366	0.803054
SQ	AX-109956643	6B	702249128	8.62287e-05	0.0821041	0.359811
KF	AX-111493816	6B	702251547	0.000447855	0.110366	0.803054
SQ	AX-111493816	6B	702251547	8.62287e-05	0.0821041	0.359811
KF	AX-111088162	6B	702294052	0.000815881	0.104787	0.889968
SQ	AX-111088162	6B	702294052	0.000224682	0.072506	0.359811
KF	AX-109899864	6B	702298749	0.000447855	0.110366	0.803054
SQ	AX-109899864	6B	702298749	8.62287e-05	0.0821041	0.359811
SQ	AX-109593322	6B	702304835	0.000150075	0.0765322	0.359811
KF	AX-108813746	6B	705157928	0.000685213	0.106404	0.846964
KF	AX-111714627	6B	705158790	0.0004883	0.109558	0.823127
SQ	AX-111464573	6B	705644031	0.000816885	0.0598177	0.361905
KF	AX-94999111	6B	707027086	0.000902167	0.103859	0.933614
KF	AX-109538092	6B	708670301	0.000185623	0.118669	0.706961
KF	AX-94702817	6B	708943077	0.000309788	0.113825	0.740544
SQ	AX-94702817	6B	708943077	0.000355287	0.0679675	0.359811
KF	AX-95210102	6B	708943119	0.000288976	0.11448	0.736152
SQ	AX-95210102	6B	708943119	0.000303634	0.0695194	0.359811
KF	AX-95190005	6B	710150807	0.000329107	0.113256	0.759947
KF	AX-95095857	6B	711756467	0.000640167	0.107035	0.846964
KF	AX-111660994	6B	712117440	0.000184009	0.118752	0.706961
KF	AX-111149663	6B	712475640	0.000589306	0.107805	0.832013
SQ	AX-94950145	6B	714578736	0.000637548	0.0622306	0.361905
SQ	AX-94459379	6B	715200266	0.000332441	0.0686235	0.359811
SQ	AX-109940878	6B	715212360	0.000420637	0.0663045	0.359811
SQ	AX-95228165	6B	715724130	0.000297383	0.0697252	0.359811
SQ	AX-95257636	6B	715724267	0.000265632	0.0708436	0.359811
SQ	AX-94688961	6B	716009912	0.000265632	0.0708436	0.359811
SQ	AX-94776342	6B	716010188	0.000265632	0.0708436	0.359811
SQ	AX-95009316	6B	716010197	0.000265632	0.0708436	0.359811
KF	AX-108904640	6D	436107978	0.000913961	0.103739	0.933614
KF	AX-108933059	6D	436173705	0.000913961	0.103739	0.933614
KF	AX-108831730	6D	463848645	0.000693357	0.106295	0.846964
KF	AX-109438733	6D	463863144	0.000296249	0.114246	0.736152
KF	AX-111869093	6D	463863176	0.000402524	0.111365	0.797068
KF	AX-110977647	6D	463866664	0.000147181	0.120877	0.650275
KF	AX-110954985	6D	463867377	0.000344546	0.112825	0.774217
KF	AX-109878889	6D	463874815	0.000296249	0.114246	0.736152
KF	AX-110276099	6D	463874914	0.000216573	0.117206	0.736152
KF	AX-111978566	6D	463878938	3.60341e-05	0.134443	0.556374
KF	AX-110334145	6D	463879041	0.000118224	0.12297	0.557485
KF	AX-110028061	6D	463879183	0.000235092	0.116429	0.736152
KF	AX-110827873	6D	463886115	0.000296249	0.114246	0.736152
KF	AX-110242843	6D	463905894	0.000211045	0.117451	0.736152
KF	AX-109437953	6D	463935364	0.000414563	0.111089	0.797068
KF	AX-111504036	6D	463957633	0.000513781	0.109083	0.823127
KF	AX-111450561	6D	463962515	0.000224252	0.116876	0.736152
KF	AX-108965137	6D	463978711	0.000331158	0.113197	0.759947
KF	AX-108735214	6D	463978983	0.000296249	0.114246	0.736152
KF	AX-109750989	6D	463979204	0.000296249	0.114246	0.736152
KF	AX-109314467	6D	463980570	0.000371481	0.112118	0.787491
KF	AX-109860045	6D	463985939	0.000296249	0.114246	0.736152
KF	AX-111670180	6D	464010187	0.000589791	0.107798	0.832013
KF	AX-109181023	6D	464010398	0.000596456	0.107693	0.832013
KF	AX-110416139	6D	464019187	0.000296249	0.114246	0.736152
KF	AX-108779900	6D	464019378	0.000171316	0.119431	0.706961
KF	AX-109322372	6D	464019844	0.000296249	0.114246	0.736152
KF	AX-110985944	6D	464021082	0.000339893	0.112952	0.771474
KF	AX-110784503	6D	464691422	0.000540324	0.108613	0.832013
KF	AX-109356345	6D	464748493	0.000933973	0.103539	0.936917
KF	AX-95259848	6D	465210110	0.000349388	0.112693	0.777322
KF	AX-110522430	6D	466623425	0.000576705	0.108006	0.832013
KF	AX-108804666	6D	467021666	0.000627378	0.107223	0.844165
SQ	AX-94688853	6D	471071095	0.000265632	0.0708436	0.359811
KF	AX-94499303	7A	11099182	0.000614644	0.107414	0.832013
KF	AX-95629480	7A	11100261	0.000291789	0.114389	0.736152
KF	AX-95659799	7A	11102598	0.000783213	0.105165	0.879964
KF	AX-109844671	7A	11103967	0.000761003	0.105432	0.879964
KF	AX-109827974	7A	36134472	0.000118289	0.122964	0.557485
KF	AX-111478136	7A	36181080	0.000180874	0.118915	0.706961
KF	AX-109423227	7A	36307711	8.22506e-05	0.126451	0.557485
KF	AX-109861511	7A	36309601	0.000863123	0.104267	0.919189
KF	AX-110548849	7A	36316643	0.000206371	0.117663	0.736152
KF	AX-110488830	7A	36324991	0.000228224	0.11671	0.736152
KF	AX-109852506	7A	36328222	0.000430184	0.110743	0.803054
KF	AX-110694277	7A	36331263	0.000136956	0.121564	0.628056
KF	AX-109282301	7A	36334168	8.22506e-05	0.126451	0.557485
KF	AX-111751166	7A	36334395	0.000772906	0.105288	0.879964
KF	AX-109492030	7A	36349095	0.000192377	0.118329	0.72047
KF	AX-110984066	7A	36368922	0.000263878	0.115337	0.736152
KF	AX-108785746	7A	36459534	0.000563372	0.108224	0.832013
KF	AX-109868635	7A	36485440	0.000417673	0.111019	0.797068
KF	AX-110197387	7A	38225069	0.000213522	0.11734	0.736152
SQ	AX-111012263	7A	261687749	0.000367284	0.06764	0.359811
KF	AX-110062171	7A	669710034	0.000903578	0.103844	0.933614
KF	AX-110056851	7A	688980095	0.000265267	0.115288	0.736152
KF	AX-110408639	7B	47617941	0.000508222	0.109185	0.823127
KF	AX-111609105	7B	611944380	0.000667509	0.106647	0.846964
KF	AX-111078922	7B	611956721	0.000897739	0.103904	0.933614
KF	AX-111504236	7B	622681601	0.000914061	0.103738	0.933614
KF	AX-94571186	7B	626068901	0.000982049	0.103077	0.945673
KF	AX-109482236	7B	626245964	0.000118955	0.122911	0.557485
KF	AX-111148246	7B	626954936	3.0145e-05	0.136184	0.556374
KF	AX-95140513	7B	627982714	4.1708e-05	0.13302	0.556374
SQ	AX-108953559	7B	630565865	0.000422731	0.0662557	0.359811
SQ	AX-110024541	7B	709600192	0.000610886	0.0626476	0.361905
SQ	AX-108746527	7B	709603064	0.000601351	0.0628013	0.361905
SQ	AX-95206768	7B	711066897	0.000449392	0.0656546	0.36032
SQ	AX-94561382	7B	711066988	0.000449392	0.0656546	0.36032
SQ	AX-94839775	7B	711067695	0.000363327	0.0677469	0.359811
SQ	AX-89635941	7B	711075593	0.000497948	0.0646478	0.361905
KF	AX-94390590	7D	11666920	0.000612679	0.107443	0.832013
KF	AX-94484534	7D	11670313	0.000808763	0.104868	0.886507
KF	AX-110930232	7D	58784583	0.000379489	0.111918	0.789569
SQ	AX-95112608	7D	616767211	0.000171602	0.0751919	0.359811
SQ	AX-94455581	7D	616767235	0.000171602	0.0751919	0.359811
a E refer to environments
