# Supplementary material for: Genetic dissection of grain iron concentration in hexaploid wheat (Triticum aestivum L.) using a genome-wide association analysis method
Source: PeerJ. 2022 Jul 22;10:e13625. doi: 10.7717/peerj.13625 (PMC9310890; doi:10.7717/peerj.13625)
Supplement: Supplemental Information 4 [file peerj-10-13625-s004.xlsx]

## Sheet: Genotype and  phenotype  
Wheat germplasms	Genotype of 10 SNPs used to haplotypes analysis on chromosome 6B												Grain Fe concentration in threeenvironments
	AX-109956643	AX-111493816	AX-111088162	AX-109899864	AX-109593322	AX-108813746	AX-111714627	AX-111464573	AX-94999111	AX-109538092	AX-94702817	AX-95210102	Phenotype in Yuanyang in 2016	Phenotype in Shangqiu in 2016	Phenotype in Kaifeng in 2016
SH266	A	T	C	A	G	G	G	N	C	T	T	T	93.35	103.69	33.12
SH261	A	T	C	A	G	G	G	S	C	T	T	T	65.63	109.44	14.04
SH268	A	T	C	A	g	G	G	S	C	T	T	T	83.59	117.48	17.86
SH278	A	T	C	A	G	G	G	S	C	T	T	T	58.45	88.39	21.2
SH298	A	T	C	A	G	G	G	S	C	T	T	T	64.77	85.14	30.74
SH299	A	T	C	A	G	G	G	S	C	T	T	T	67.79	83.06	37.89
SH258	A	T	C	A	R	G	G	S	C	T	T	T	62.91	93.35	35.03
SH269	A	T	C	A	R	G	G	S	C	T	T	T	64.92	78.13	19.29
SH272	A	T	C	A	R	G	G	S	C	T	T	T	77.27	133.85	23.64
SH293	A	T	C	A	R	G	G	S	C	T	T	T	61.76	91.23	10.7
SH297	A	T	C	A	R	G	G	S	C	T	T	T	52.85	92.34	10.32
SH292	G	C	T	G	A	G	G	S	C	T	T	T	49.12	87.68	24.54
SH282	A	T	C	A	R	G	G	S	C	T	T	N	80.72	85.86	15.95
SH280	A	T	C	A	G	G	G	S	Y	T	C	C	93.22	82.19	14.04
SH403	A	T	C	A	G	S	C	G	Y	C	C	C	77	121.84	131.86
SH400	G	C	T	G	A	C	C	G	C	C	C	C	54.11	71.28	105.14
SH351	G	C	T	G	A	C	C	N	C	C	C	C	41.65	52.16	216.76
SH262	G	C	T	G	A	C	C	G	C	T	C	C	74.14	70.95	24.54
SH317	G	C	T	G	A	C	C	G	C	T	C	C	55.01	82.29	67.46
SH337	G	C	T	G	A	C	C	G	C	T	C	C	43.66	62.33	135.67
SH444	G	C	T	G	A	C	C	G	N	C	C	C	72.71	65.56	200.06
SH349	G	C	T	G	A	C	C	G	T	C	C	C	46.25	20.24	211.02
SH240	G	C	T	G	A	C	C	G	Y	C	C	C	29.59	83.59	161.9
SH243	G	C	T	G	A	C	C	G	Y	C	C	C	77.56	70.37	103.24
SH244	G	C	T	G	A	C	C	G	Y	C	C	C	74.68	85.02	117.07
SH245	G	C	T	G	A	C	C	G	Y	C	C	C	87.9	89.62	80.82
SH246	G	C	T	G	A	C	C	G	Y	C	C	C	68.36	97.95	215.8
SH247	G	C	T	G	A	C	C	G	Y	C	C	C	58.6	84.74	72.23
SH251	G	C	T	G	A	C	C	G	Y	C	C	C	31.31	83.3	23.01
SH253	G	C	T	G	A	C	C	G	Y	C	C	C	78.13	70.81	57.92
SH267	G	C	T	G	A	C	C	G	Y	C	C	C	59.75	72.1	23.58
SH276	G	C	T	G	A	C	C	G	Y	C	C	C	52.85	88.1	23.1
SH284	G	C	T	G	A	C	C	G	Y	C	C	C	64.34	79.39	54.58
SH289	G	C	T	G	A	C	C	G	Y	C	C	C	51.25	86.02	56.49
SH294	G	C	T	G	A	C	C	G	Y	C	C	C	64.05	82.52	41.23
SH300	G	C	T	G	A	C	C	G	Y	C	C	C	56.16	79.06	55.06
SH302	G	C	T	G	A	C	C	G	Y	C	C	C	54.43	74.82	72.23
SH303	G	C	T	G	A	C	C	G	Y	C	C	C	57.88	75.14	72.71
SH309	G	C	T	G	A	C	C	G	Y	C	C	C	62.33	76.02	70.33
SH310	G	C	T	G	A	C	C	G	Y	C	C	C	62.62	79.5	54.11
SH311	G	C	T	G	A	C	C	G	Y	C	C	C	56.16	87.75	73.19
SH320	G	C	T	G	A	C	C	G	Y	C	C	C	72.67	69.94	132.33
SH325	G	C	T	G	A	C	C	G	Y	C	C	C	38.35	58.31	104.67
SH329	G	C	T	G	A	C	C	G	Y	C	C	C	42.51	60.03	85.11
SH330	G	C	T	G	A	C	C	G	Y	C	C	C	64.49	69.23	48.38
SH331	G	C	T	G	A	C	C	G	Y	C	C	C	64.63	65.06	60.31
SH332	G	C	T	G	A	C	C	G	Y	C	C	C	36.77	57.74	61.26
SH335	G	C	T	G	A	C	C	G	Y	C	C	C	70.66	73.1	108.01
SH339	G	C	T	G	A	C	C	G	Y	C	C	C	60.03	63.34	75.57
SH342	G	C	T	G	A	C	C	G	Y	C	C	C	56.16	62.04	116.59
SH356	G	C	T	G	A	C	C	G	Y	C	C	C	49.46	39.2	196.25
SH364	G	C	T	G	A	C	C	G	Y	C	C	C	53	58.88	76.53
SH365	G	C	T	G	A	C	C	G	Y	C	C	C	46.53	52.17	58.88
SH371	G	C	T	G	A	C	C	G	Y	C	C	C	48.86	41.23	75.09
SH372	G	C	T	G	A	C	C	G	Y	C	C	C	69.9	72.28	92.74
SH375	G	C	T	G	A	C	C	G	Y	C	C	C	108.96	94.17	75.57
SH380	G	C	T	G	A	C	C	G	Y	C	C	C	86.54	45.52	80.82
SH383	G	C	T	G	A	C	C	G	Y	C	C	C	68.53	59.83	158.57
SH390	G	C	T	G	A	C	C	G	Y	C	C	C	53.63	70.33	85.59
SH411	G	C	T	G	A	C	C	G	Y	C	C	C	98.47	41.71	116.59
SH417	G	C	T	G	A	C	C	G	Y	C	C	C	78.43	49.82	95.13
SH425	G	C	T	G	A	C	C	G	Y	C	C	C	105.14	85.11	125.18
SH429	G	C	T	G	A	C	C	G	Y	C	C	C	133.76	90.36	144.26
SH442	G	C	T	G	A	C	C	G	Y	C	C	C	53.63	77.96	162.38
SH344	G	C	T	G	A	C	C	S	Y	C	C	C	69.51	80.72	111.35
SH397	G	C	T	G	A	C	C	S	Y	C	C	C	58.88	46.48	104.19
SH398	G	C	T	G	A	C	C	S	Y	C	C	C	54.11	69.37	110.39
SH273	A	T	C	A	G	G	G	S	C	C	C	C	43.09	85.31	28.83
SH255	G	C	T	G	A	G	G	G	C	C	C	C	61.04	81	25.49
SH287	G	C	T	G	A	G	G	G	C	C	C	C	107.72	73.9	30.26
SH312	G	C	T	G	A	G	G	G	C	C	C	C	56.87	82.01	100.37
SH323	G	C	T	G	A	G	G	G	C	C	C	C	52.28	62.62	101.33
SH326	G	C	T	G	A	G	G	G	C	C	C	C	37.34	57.3	54.11
SH328	G	C	T	G	A	G	G	G	C	C	C	C	77.41	73.53	180.51
SH334	G	C	T	G	A	G	G	G	C	C	C	C	82.01	78.13	76.05
SH362	G	C	T	G	A	G	G	G	C	C	C	C	45.96	50.77	75.57
SH388	G	C	T	G	A	G	G	G	C	C	C	C	50.77	79.86	77.48
SH402	G	C	T	G	A	G	G	G	C	C	C	C	83.68	69.85	94.17
SH406	G	C	T	G	A	G	G	G	C	C	C	C	77.48	46.95	193.86
SH407	G	C	T	G	A	G	G	G	C	C	C	C	124.22	69.85	128.52
SH414	G	C	T	G	A	G	G	G	C	C	C	C	99.42	63.17	145.69
SH422	G	C	T	G	A	G	G	G	C	C	C	C	130.9	105.14	149.5
SH316	G	C	T	G	A	G	G	N	C	C	C	C	70.09	91.34	64.12
SH288	G	C	T	G	A	G	G	S	C	C	C	C	63.48	78.97	29.75
SH370	G	C	T	G	A	G	G	S	C	C	C	C	45.1	62.22	131.38
SH374	G	C	T	G	A	G	G	S	C	C	C	C	92.06	97.51	83.68
SH389	G	C	T	G	A	G	G	S	C	C	C	C	93.22	65.08	72.71
SH421	G	C	T	G	A	G	G	S	C	C	C	C	100.85	123.75	110.39
SH281	G	C	T	G	A	G	G	G	N	C	C	C	82.1	84.83	18.81
SH359	G	C	T	G	A	G	G	G	N	C	C	C	47.11	42.17	230.59
SH346	G	C	T	G	A	G	G	G	T	C	C	C	43.37	90.77	160.95
SH360	G	C	T	G	A	G	G	G	T	C	C	C	41.08	40.75	231.54
SH443	G	C	T	G	A	G	G	G	T	C	C	C	49.21	105.14	178.6
SH446	G	C	T	G	A	G	G	G	T	C	C	C	72.23	60.31	179.55
SH241	G	C	T	G	A	G	G	G	Y	C	C	C	73.1	87.32	126.61
SH242	G	C	T	G	A	G	G	G	Y	C	C	C	61.18	103.41	237.74
SH248	G	C	T	G	A	G	G	G	Y	C	C	C	89.62	89.05	175.74
SH249	G	C	T	G	A	G	G	G	Y	C	C	C	28.15	92.49	103.24
SH250	G	C	T	G	A	G	G	G	Y	C	C	C	64.34	82.29	127.09
SH252	G	C	T	G	A	G	G	G	Y	C	C	C	64.34	60.61	37.89
SH254	G	C	T	G	A	G	G	G	Y	C	C	C	36.19	88.76	31.21
SH256	G	C	T	G	A	G	G	G	Y	C	C	C	36.91	96.23	28.35
SH257	G	C	T	G	A	G	G	G	Y	C	C	C	56.01	158.27	19.29
SH259	G	C	T	G	A	G	G	G	Y	C	C	C	56.73	120.5	11.18
SH260	G	C	T	G	A	G	G	G	Y	C	C	C	64.92	90.48	25.97
SH263	G	C	T	G	A	G	G	G	Y	C	C	C	53.28	92.49	16.41
SH264	G	C	T	G	A	G	G	G	Y	C	C	C	52.57	70.95	35.03
SH265	G	C	T	G	A	G	G	G	Y	C	C	C	45.82	115.47	26.92
SH270	G	C	T	G	A	G	G	G	Y	C	C	C	74.4	82.01	21.64
SH271	G	C	T	G	A	G	G	G	Y	C	C	C	65.2	77.7	26.24
SH274	G	C	T	G	A	G	G	G	Y	C	C	C	87.03	71.52	21.66
SH275	G	C	T	G	A	G	G	G	Y	C	C	C	70.39	83.34	35.51
SH283	G	C	T	G	A	G	G	G	Y	C	C	C	112.02	71.28	38.37
SH285	G	C	T	G	A	G	G	G	Y	C	C	C	43.52	84.43	33.6
SH286	G	C	T	G	A	G	G	G	Y	C	C	C	66.93	84.91	30.74
SH290	G	C	T	G	A	G	G	G	Y	C	C	C	56.87	83.34	38.84
SH291	G	C	T	G	A	G	G	G	Y	C	C	C	57.02	90.14	15.95
SH295	G	C	T	G	A	G	G	G	Y	C	C	C	56.44	88.83	20.24
SH296	G	C	T	G	A	G	G	G	Y	C	C	C	67.65	85.81	26.92
SH301	G	C	T	G	A	G	G	G	Y	C	C	C	44.52	76.18	60.79
SH304	G	C	T	G	A	G	G	G	Y	C	C	C	48.54	82.66	40.28
SH305	G	C	T	G	A	G	G	G	Y	C	C	C	56.59	80.52	49.38
SH306	G	C	T	G	A	G	G	G	Y	C	C	C	53.14	75.41	68.89
SH307	G	C	T	G	A	G	G	G	Y	C	C	C	52.57	81.92	43.61
SH308	G	C	T	G	A	G	G	G	Y	C	C	C	83.59	79.37	45.05
SH314	G	C	T	G	A	G	G	G	Y	C	C	C	64.77	78.99	54.11
SH315	G	C	T	G	A	G	G	G	Y	C	C	C	87.61	82.44	125.18
SH318	G	C	T	G	A	G	G	G	Y	C	C	C	64.63	80.72	75.57
SH319	G	C	T	G	A	G	G	G	Y	C	C	C	96.23	93.35	77.48
SH321	G	C	T	G	A	G	G	G	Y	C	C	C	57.45	65.2	100.85
SH322	G	C	T	G	A	G	G	G	Y	C	C	C	47.11	76.98	106.1
SH324	G	C	T	G	A	G	G	G	Y	C	C	C	65.78	67.21	4.67
SH327	G	C	T	G	A	G	G	G	Y	C	C	C	40.79	65.78	62.22
SH333	G	C	T	G	A	G	G	G	Y	C	C	C	47.68	66.07	116.59
SH336	G	C	T	G	A	G	G	G	Y	C	C	C	45.24	71.38	118.02
SH338	G	C	T	G	A	G	G	G	Y	C	C	C	72.1	55.29	63.65
SH340	G	C	T	G	A	G	G	G	Y	C	C	C	55.01	70.95	79.39
SH341	G	C	T	G	A	G	G	G	Y	C	C	C	40.64	47.97	100.85
SH343	G	C	T	G	A	G	G	G	Y	C	C	C	64.34	68.08	103.71
SH345	G	C	T	G	A	G	G	G	Y	C	C	C	49.12	62.62	115.64
SH357	G	C	T	G	A	G	G	G	Y	C	C	C	45.38	57.92	226.77
SH361	G	C	T	G	A	G	G	G	Y	C	C	C	33.03	44.57	218.67
SH363	G	C	T	G	A	G	G	G	Y	C	C	C	50.99	53.63	71.28
SH366	G	C	T	G	A	G	G	G	Y	C	C	C	55.87	46.95	51.25
SH367	G	C	T	G	A	G	G	G	Y	C	C	C	44.24	105.62	67.46
SH368	G	C	T	G	A	G	G	G	Y	C	C	C	42.66	58.72	79.39
SH369	G	C	T	G	A	G	G	G	Y	C	C	C	40.5	52.68	54.11
SH376	G	C	T	G	A	G	G	G	Y	C	C	C	72.85	71.28	64.6
SH377	G	C	T	G	A	G	G	G	Y	C	C	C	86.54	67.46	103.24
SH378	G	C	T	G	A	G	G	G	Y	C	C	C	66.03	64.6	1.33
SH379	G	C	T	G	A	G	G	G	Y	C	C	C	72.02	77.48	155.7
SH381	G	C	T	G	A	G	G	G	Y	C	C	C	69.03	47.91	111.82
SH382	G	C	T	G	A	G	G	G	Y	C	C	C	72.71	66.03	169.37
SH384	G	C	T	G	A	G	G	G	Y	C	C	C	64.07	59.35	101.81
SH385	G	C	T	G	A	G	G	G	Y	C	C	C	63.52	50.77	149.03
SH386	G	C	T	G	A	G	G	G	Y	C	C	C	76.05	65.56	64.6
SH387	G	C	T	G	A	G	G	G	Y	C	C	C	77.96	50.77	99.9
SH391	G	C	T	G	A	G	G	G	Y	C	C	C	103.24	53.63	64.6
SH392	G	C	T	G	A	G	G	G	Y	C	C	C	72.23	88.93	95.13
SH393	G	C	T	G	A	G	G	G	Y	C	C	C	83.2	97.99	107.53
SH394	G	C	T	G	A	G	G	G	Y	C	C	C	85.11	75.09	97.04
SH395	G	C	T	G	A	G	G	G	Y	C	C	C	62.01	96.56	112.78
SH396	G	C	T	G	A	G	G	G	Y	C	C	C	45.52	78.43	75.57
SH405	G	C	T	G	A	G	G	G	Y	C	C	C	78.43	46.95	150.93
SH409	G	C	T	G	A	G	G	G	Y	C	C	C	118.02	59.35	89.4
SH410	G	C	T	G	A	G	G	G	Y	C	C	C	119.93	48.86	88.93
SH412	G	C	T	G	A	G	G	G	Y	C	C	C	98.94	41.71	95.6
SH413	G	C	T	G	A	G	G	G	Y	C	C	C	131.38	56.02	92.74
SH416	G	C	T	G	A	G	G	G	Y	C	C	C	125.63	32.17	99.9
SH418	G	C	T	G	A	G	G	G	Y	C	C	C	143.78	20.23	85.59
SH419	G	C	T	G	A	G	G	G	Y	C	C	C	85.11	26.92	124.22
SH420	G	C	T	G	A	G	G	G	Y	C	C	C	108.96	29.78	102.76
SH423	G	C	T	G	A	G	G	G	Y	C	C	C	71.23	78.43	122.79
SH424	G	C	T	G	A	G	G	G	Y	C	C	C	63.17	67.64	118.98
SH426	G	C	T	G	A	G	G	G	Y	C	C	C	89.4	64.6	145.69
SH427	G	C	T	G	A	G	G	G	Y	C	C	C	124.22	68.89	142.83
SH428	G	C	T	G	A	G	G	G	Y	C	C	C	128.52	107.53	196.25
SH430	G	C	T	G	A	G	G	G	Y	C	C	C	60.26	74.14	186.23
SH432	G	C	T	G	A	G	G	G	Y	C	C	C	82.71	76.53	211.99
SH433	G	C	T	G	A	G	G	G	Y	C	C	C	114.68	63.17	202.93
SH434	G	C	T	G	A	G	G	G	Y	C	C	C	82.07	61.26	227.25
SH435	G	C	T	G	A	G	G	G	Y	C	C	C	78.43	48.38	228.2
SH436	G	C	T	G	A	G	G	G	Y	C	C	C	72.12	99.42	216.76
SH437	G	C	T	G	A	G	G	G	Y	C	C	C	88.45	77.96	223.91
SH438	G	C	T	G	A	G	G	G	Y	C	C	C	78.1	93.22	250.62
SH439	G	C	T	G	A	G	G	G	Y	C	C	C	76.53	73.19	216.28
SH440	G	C	T	G	A	G	G	G	Y	C	C	C	76.53	53.63	128.52
SH445	G	C	T	G	A	G	G	G	Y	C	C	C	46.48	62.69	245.85
SH408	G	C	Y	G	A	G	G	G	Y	C	C	C	91.31	38.84	129.95
SH347	G	C	T	G	A	S	C	N	N	C	C	C	44.81	62.14	175.74

## Sheet: Block1A and block1B
Haplotypes analysis for block1A and block1B on chromosome 6B
Block1_A	vs	Block1_B
Hmp1	Fe_2016_YY	Fe_2016_SQ	Fe_2016_KF	Number of wheat germplasm	Percentage(%)
Mean value for grain Fe	63.3166	67.3162	98.3474	65	0.343915
Ftest	0.0567622	0.110916	0.0234698
Ttest	0.0380867	0.0483963	0.698864
SD	19.5229	17.1471	48.8073
SE	2.44036	2.23236	6.52215
Hmp2
Mean value for grain Fe	70.5876	73.4533	102.059	124	0.656085
SD	24.2351	20.6683	64.1291
SE	2.1852	1.87894	5.82992

## Sheet: Block2A and block2B
Haplotypes analysis for block1A and block1B on chromosome 6B
Block2_A	vs	Block2_B
Hmp1	Fe_2016_YY	Fe_2016_SQ	Fe_2016_KF	Number of wheat germplasm	Percentage(%)
Mean value for grain Fe	64.2767	68.1917	92.903	58	0.698795
Ftest	0.137446	0.717488	0.458625
Ttest	0.0605246	0.0360727	0.752292
SD	20.0147	16.7446	42.1406
SE	2.65101	2.32205	6.02008
Hmp2
Mean value for grain Fe	74.1972	77.2748	96.4122	25	0.301205
SD	25.4962	17.7141	47.7608
SE	5.20439	3.77666	10.1826

## Sheet: Block1A+2A and block1B+2B
Haplotypes analysis for block1A+2A and block1B+2B on chromosome 6B
Block1_A	Block2_A	vs	Block1_B	Block2_B
	Fe_2016_YY	Fe_2016_SQ	Fe_2016_KF	Number of wheat germplasm	Percentage(%)
Mean value for grain Fe	64.2767	68.1917	92.903	58	0.707317
Ftest	0.162781	0.644569	0.557993
Ttest	0.0356846	0.0484649	0.556147
SD	20.0147	16.7446	42.1406
SE	2.65101	2.32205	6.02008
Mean value for grain Fe	75.4933	76.9095	99.4841	24	0.292683
SD	25.1892	18.0421	46.501
SE	5.2523	3.93711	10.1473
