# Supplementary material for: Genetic dissection of grain iron concentration in hexaploid wheat (Triticum aestivum L.) using a genome-wide association analysis method
Source: PeerJ. 2022 Jul 22;10:e13625. doi: 10.7717/peerj.13625 (PMC9310890; doi:10.7717/peerj.13625)
Supplement: Supplemental Information 5 [file peerj-10-13625-s005.xlsx]

## Sheet: Table S1
Table S3 102 quantitative trait loci identified using linkage mapping or association analysis for wheat Fe traits in the previous studies
Nua	Reported QTL name	Chromosome	Mapping interval or closest marker	Physical positionb (Mb)	References
1	QFe.bhu-1A.1	1A	1046200|F|0-1228280|F|0	13.8	Srinivasa et al. (2016)
2	QGFe.co-1A	1A	100008269|F|0-1134239|F|0	538.5	Liu et al. (2019)
3	QFe.bhu-1A.2	1A	2289695|F|0-1218555|F|0	Undetermined	Srinivasa et al. (2016)
4	QFe.bhu-1A.3	1A	1708014|F|0-1000008|F|0	Undetermined	Srinivasa et al. (2016)
5	QGFe.co-2A	2A	4993302|F|0-3954215	Undetermined	Liu et al. (2019)
6	QFe.bhu-2A	2A	1081485|F|0-1216621|F|0	Undetermined	Srinivasa et al. (2016)
7	QGFe.ada-2A	2A	wPt-2087–wPt-733,012	21.3	Velu et al. (2017)
8	QGFe.cimmyt-2A_P2	2A	4262668;1226245	304.8	Crespo-Herrera et al. (2017)
9	-	2A	Xgwm312-Xgwm817	695.8	Roshanzamir et al. (2013)
10	-	2A	Xgwm817-Xgwm630		Roshanzamir et al. (2013)
11	QGFe.iari-2A	2A	Xgwm359-Xgwm249	94.1	Krishnappa et al. (2017)
12	-	2A	gwm473	320.1	Peleg et al. (2009)
13	-	2A	gwm1054	443	Peleg et al. (2009)
14	-	2A	Xwmc382-Xbarc124	3.1	Tiwari et al. (2009)
15		2A	AX-109979251	763.8	Alomari et al. (2018)
16	QFeC-2A	2A	1195992–2300803	Undetermined	Rathan et al.(2021)
17	QGFe.ada-3A	3A	wPt-8779	25.4	Velu et al. (2017)
18	-	3A	wPt-2756	567.2	Peleg et al. (2009)
19	QGFe.sar_3A/3B	3A/3B	wPt-0784-wPt-8875	Undetermined	Velu et al. (2017)
20	QGFe.cimmyt-3A_P1	3A	1234521;3034169F0-11AG	Undetermined	Crespo-Herrera et al. (2017)
21	-	4A	Xwmc468-Xbarc170	612.4	Pu et al. (2014)
22	QGFe.cimmyt-4A_P2	4A	3385350;1211533	5.1	Crespo-Herrera et al. (2017)
23	-	5A	Xsrap97-Xbarc330	523.8	Pu et al. (2014)
24	QGFe.co-5A.2	5A	1102433-988523	528.2	Liu et al. (2019)
25	QGFe.iari-5A	5A	Xbarc144		Krishnappa et al. (2017)
26	-	5A	WMC74-Xgwm291	700.3	Shi et al.(2013)
27	-	5A	gwm154	21	Peleg et al. (2009)
28	QFe-5A1	5A	Xgwm154-Xbarc186	33.8	Xu et al. (2012)
29	QGFe.co-5A.1	5A	14394095|F|0-4543804	Undetermined	Liu et al. (2019)
30		5A	AX-158538945	539.9	Alomari et al. (2018)
31	-	6A	gwm1150	318.9	Peleg et al. (2009)
32	QFe.Across_6AL	6A	TP5797-TP5676	Undetermined	Crespo-Herrera et al. (2015)
33	-	6A	M13996	Undetermined	Kumar et al.(2016)
34	-	6A	M15741	Undetermined	Kumar et al.(2016)
35	QFe.caas-6AS	6A	AX-108951317–AX-109304443	Undetermined	Wang et al. (2021b)
36	QFeC-6A	6A	1698406–100027274	Undetermined	Rathan et al.(2021)
37	QGFe.iari-7A	7A	Xcfa2019		Krishnappa et al. (2017)
38	-	7A	Xgwm260-P3156-360	248.1	Shi et al.(2013)
39	-	7A	Xgwm473-Xbarc29	622	Tiwari et al. (2009)
40	-	7A	Xcfd31-Xcfa2049	40.9	Tiwari et al. (2009)
41	-	7A	M184	Undetermined	Kumar et al.(2016)
42	-	7A	wPt-9555	Undetermined	Peleg et al. (2009)
43	QGFe.sar_1B	1B	wPt-741,612-wPt-729,920	56.1	Velu et al. (2017)
44	QGFe.ada-1B	1B	wPt-4532	Undetermined	Velu et al. (2017)
45	QFeC-1B	1B	1240883–1005607	Undetermined	Rathan et al.(2021)
46	-	2B	wPt-7004-wPt-4210	768.8	Pu et al. (2014)
47	QGFe.ada-2Btsk	2B	wPt-9812	680.1	Velu et al. (2017)
48	QGFe.ada-2Btkm	2B	wPt-1394–wPt-7864	760.7	Velu et al. (2017)
49	QGFe.cimmyt-2B_P2	2B	wPt-0289;1026059	146.8	Crespo-Herrera et al. (2017)
50	QFe.bhu-2B	2B	gwm120–wpt2430	641.1	Tiwari et al. (2016)
51	-	2B	wPt-8404	31.4	Peleg et al. (2009)
52	QFe.Across_2BL	2B	TP54992-TP7812	Undetermined	Crespo-Herrera et al. (2015)
53	-	2B	M10312	Undetermined	Kumar et al.(2016)
54	QGFe.cimmyt-3B_2P2	3B	4394657;3947677	32.6	Crespo-Herrera et al. (2017)
55	-	3B	gwm1266	808.7	Peleg et al. (2009)
56	QFe.bhu-3B	3B	3022954|F|0-1102324|F|0	Undetermined	Srinivasa et al. (2016)
57	QGFe.co-3B.1	3B	1089107-1127875|F|0	Undetermined	Liu et al. (2019)
58	QGFe.co-3B.2	3B	1233878-4262223|F|0	Undetermined	Liu et al. (2019)
59	-	3B	M11941	Undetermined	Kumar et al.(2016)
60	QGFe.cimmyt-3B_1P2	3B	3533713;1007339	Undetermined	Crespo-Herrera et al. (2017)
61		3B	AX-94457592	731.2	Alomari et al. (2018)
62	QFe.caas-3BL	3B	AX-111016352–AX-94835626	Undetermined	Wang et al. (2021b)
63	QGFe.co-4B	4B	1242543-1125612|F|0	640.8	Liu et al. (2019)
64	QGFe.cimmyt-4B_P1	4B	1008589F0-58TC-2256263	528.2	Crespo-Herrera et al. (2017)
65	-	4B	wPt-3255	626	Peleg et al. (2009)
66	QFe.Across_4BS	4B	TP91631-TP81797	Undetermined	Crespo-Herrera et al. (2015)
67	-	5B	wPt-7237-wPt-0708	22.4	Pu et al. (2014)
68	-	5B	Xbarc216-Xbarc74	445.6	Pu et al. (2014)
69	QGFe.sar_5BTKM	5B	wPt-8125-wPt-9504	651	Velu et al. (2017)
70	QGFe.sar_5BMCO	5B	wPt-7400-wPt-8449	183.7	Velu et al. (2017)
71	QGFe.cimmyt-5B_P1	5B	4989996-5410720	489	Crespo-Herrera et al. (2017)
72	QGFe.cimmyt-5B_P2	5B	4407677;1129284	686.5	Crespo-Herrera et al. (2017)
73	QFe.Y13-14_5BL	5B	TP17691-TP85478	Undetermined	Crespo-Herrera et al. (2015)
74	QFe.Y13-14_5BL	5B	TP76814-TP3728	Undetermined	Crespo-Herrera et al. (2015)
75	QFe.Y13-14_5BS	5B	TP91631-TP81797	Undetermined	Crespo-Herrera et al. (2015)
76	QGFe.ada-6B	6B	wPt-667,798–wPt-7065	5	Velu et al. (2017)
77	-	6B	wPt-5270	694.1	Peleg et al. (2009)
78	QGFe.co-6B	6B	5332918-7342703	Undetermined	Liu et al. (2019)
79	QFe.Y13-14_6BL	6B	TP68423-TP54256	Undetermined	Crespo-Herrera et al. (2015)
80	QGFe.ada-7B	7B	wPt-5922	679.6	Velu et al. (2017)
81	QGFe.iari-7B	7B	Xgwm577	Undetermined	Krishnappa et al. (2017)
82	-	7B	Xgwm400-P6401-238	34.3	Shi et al.(2013)
83	-	7B	gwm400	34.3	Peleg et al. (2009)
84	QFe.caas-7BL	7B	AX-95631535–AX-89745787	Undetermined	Wang et al. (2021b)
85	QFeC-1D	1D	1318890–1167672	Undetermined	Rathan et al.(2021)
86	-	2D	Xgwm157	470.2	Gorafi et al.(2016)
87	QFe.Across_2DS	2D	TP16058-TP69509	Undetermined	Crespo-Herrera et al. (2015)
88	QGFe.co-3D	3D	1372776-100008980|F|0	396.1	Liu et al. (2019)
89	-	3D	Xgwm1047-Xgwm383	532.2	Roshanzamir et al. (2013)
90	-	4D	Xgwm4670-Xgwm194	Undetermined	Roshanzamir et al. (2013)
91	-	4D	Xgwm154-Xbarc108	Undetermined	Pu et al. (2014)
92	-	4D	WMC331-Xgwm624	397.2	Shi et al.(2013)
93	-	4D	Xwmc399	484.7	Gorafi et al.(2016)
94	QGFe.cimmyt-4D_P2	4D	2363822;3961236	Undetermined	Crespo-Herrera et al. (2017)
95	QFe.caas-4DS	4D	AX-89593703–AX-89398511	Undetermined	Wang et al. (2021b)
96	-	5D	Xwmc357	499.6	Gorafi et al.(2016)
97	-	5D	wPt-667104-wPt-731590	6.8	Pu et al. (2014)
98	QFe.Y12-13_6DS	6D	TP52164-TP31712	Undetermined	Crespo-Herrera et al. (2015)
99	-	7D	wPt-663949-wPt-7068	616.6	Pu et al. (2014)
100	-	7D	Xbarc184-Xgwm1055	13.9	Roshanzamir et al. (2013)
101	QFe.Across_7DS	7D	TP43715-TP37547	Undetermined	Crespo-Herrera et al. (2015)
102	-	7D	M2678	Undetermined	Kumar et al.(2016)
a Nu is the series number of Fe QTL
b Physical position refer to the position of most closest marker in the mapping interval.
